1  
2  
3  
4  
5  
6  
7  
8  
9  
10  
11  
12  
13  
14  
15  
16  
17  
18  
19  
20  
21  
22  
23  
24  
25  
26

***Oral iron exacerbates colitis and influences the intestinal  
microbiome***

**Awad Mahalhal <sup>1,5</sup>, Jonathan M. Williams <sup>3</sup>, Sophie Johnson <sup>1</sup>, Nicholas Ellaby <sup>2</sup>, Carrie  
A. Duckworth <sup>1</sup>, Michael D. Burkitt <sup>1</sup>, Xuan Liu <sup>2</sup>, Georgina L. Hold <sup>4</sup>, Barry J. Campbell <sup>1</sup>,  
D. Mark Pritchard <sup>1</sup>, Chris S. Probert <sup>1</sup>**

<sup>1</sup>Gastroenterology Research Unit, Department of Cellular and Molecular Physiology, Institute  
of Translational Medicine, University of Liverpool, Liverpool, L69 3GE, UK

<sup>2</sup>Department of Functional & Comparative Genomics, Institute of Integrative Biology, Liverpool  
University, Liverpool, L69 7ZB, UK

<sup>3</sup>Pathobiology and Population Sciences, Royal Veterinary College, North Mymms, AL9 7TA,  
UK

<sup>4</sup>Department of Medicine, St George & Sutherland Clinical School, University of New South  
Wales, Sydney, NSW, Australia

<sup>5</sup>Department of Anatomy and Histology, Faculty of Medicine, Benghazi University, Benghazi-  
Libya

Correspondence to:  
Email: [awad.mahalhal@liverpool.ac.uk](mailto:awad.mahalhal@liverpool.ac.uk) (AM)

27 **"Authors' contributions."**

28

29 **Awad Mahalhal** [conceived and designed research, performed experiments, analysed data,  
30 interpreted results of experiments, prepared figures, drafted manuscript, edited and revised  
31 manuscript and approved the final version of manuscript]

32 **Jonathan M. Williams** [interpreted results of experiments, drafted manuscript, approved the  
33 final version of manuscript]

34 **Sophie Reade** [conceived and designed research]

35 **Nicholas Ellaby** [analysed data]

36 **Carrie A. Duckworth** [conceived and designed research, edited and revised manuscript,  
37 approved the final version of the manuscript]

38 **Michael D. Burkitt** [analysed data, edited and revised manuscript, approved the final version  
39 of manuscript]

40 **Xuan Liu** [analysed data]

41 **Georgina L. Hold** [analysed data, prepared figures, drafted manuscript, edited and revised  
42 manuscript, approved the final version of manuscript]

43 **Barry J. Campbell** [conceived and designed research, interpreted results of experiments,  
44 edited and revised manuscript, approved the final version of manuscript]

45 **D. Mark Pritchard** [conceived and designed research, edited and revised manuscript,  
46 approved the final version of the manuscript]

47 **Chris S. Probert** [conceived and designed research, analysed data, interpreted results of  
48 experiments, edited and revised manuscript, approved the final version of manuscript].

49

50

51

52

53

54

55 **Abstract:**

56 Inflammatory bowel disease (IBD) is associated with anaemia and oral iron replacement to  
57 correct this can be problematic, intensifying inflammation and tissue damage. The intestinal  
58 microbiota also plays a key role in the pathogenesis of IBD, and iron supplementation likely  
59 influences gut bacterial diversity in patients with IBD. Here, we assessed the impact of dietary  
60 iron, using chow diets containing either 100, 200 or 400 ppm, fed *ad libitum* to adult female  
61 C57BL/6 mice in the presence or absence of colitis induced using dextran sulfate sodium  
62 (DSS), on (i) clinical and histological severity of acute DSS-induced colitis, and (ii) faecal  
63 microbial diversity, as assessed by sequencing the V4 region of 16S rRNA. Increasing or  
64 decreasing dietary iron concentration from the standard 200 ppm exacerbated both clinical  
65 and histological severity of DSS-induced colitis. DSS-treated mice provided only half the  
66 standard levels of iron *ad libitum* (i.e. chow containing 100 ppm iron) lost more body weight  
67 than those receiving double the amount of standard iron (i.e. 400 ppm);  $p < 0.01$ . Faecal  
68 calprotectin levels were significantly increased in the presence of colitis in those consuming  
69 100 ppm iron at day 8 (5.94-fold) versus day-10 group (4.14-fold) ( $p < 0.05$ ), and for the 400  
70 ppm day-8 group (8.17-fold) versus day-10 group (4.44-fold) ( $p < 0.001$ ). In the presence of  
71 colitis, dietary iron at 400 ppm resulted in a significant reduction in faecal abundance of  
72 Firmicutes and Bacteroidetes, and increase of Proteobacteria, changes which were not  
73 observed with lower dietary intake of iron at 100 ppm. Overall, altering dietary iron intake  
74 exacerbated DSS-induced colitis; increasing the iron content of the diet also led to changes in  
75 intestinal bacteria diversity and composition after colitis was induced with DSS.

76

77

78

79

80

## 81 Introduction

82 Inflammatory bowel disease (IBD) is characterised by chronic inflammation of the  
83 gastrointestinal tract. Inflammation is associated with intestinal ulceration in both ulcerative  
84 colitis (UC) and Crohn's disease (CD). Bleeding and malabsorption may also occur in IBD <sup>1,2</sup>,  
85 and iron deficiency anaemia occurs in one-third of patients <sup>1,3</sup>. The best way to administer iron  
86 replacement to patients with IBD is a subject of debate, with both oral iron and intravenous  
87 (IV) iron supplements being considered effective <sup>4, 5</sup>. However, ferrous forms of oral iron  
88 replacement appear to be poorly absorbed, and the resultant free luminal iron likely results in  
89 enhanced catalytic activity and production of reactive oxygen species within the intestine <sup>6, 7</sup>.  
90 High dose oral iron consumption appears to be associated with more side effects than half of  
91 the standard dose of iron <sup>8</sup>, perhaps as a result of unabsorbed iron reaching the colon.  
92 Intravenous (IV) iron therapy offers effective alternative management of iron deficiency  
93 anaemia. While the route of administration is not thought to influence disease activity; oral iron  
94 supplements have been shown to disturb the microbiota, with disturbances in bacterial  
95 phylotypes and associated aberrations in faecal metabolites compared with IV treatment <sup>9, 10</sup>.

96  
97 The gut microbiota typically comprises greater than  $10^{11}$  microorganisms per gram of intestinal  
98 content <sup>11</sup>, playing an important role in the maintenance of gut health, including protection  
99 against pathogens (colonisation resistance) and the synthesis of beneficial short-chain fatty  
100 acids (SCFA) generated through fermentation of dietary fibre <sup>12, 13</sup>. IBD is associated with a  
101 perturbation of gut microbiota ('dysbiosis'), with the observed reduction in microbial diversity,  
102 including a decline in beneficial bacteria from the phyla Bacteroidetes and Firmicutes, although  
103 within these classifications a much more complicated picture exists, alongside enhancement  
104 of some potentially harmful Proteobacteria, particularly within the family *Enterobacteriaceae*  
105 <sup>14, 15</sup>. The key mechanisms responsible for the development of this dysbiosis and its  
106 contribution to IBD are to date poorly defined.

107

108 Iron is an essential metal that is required by most organisms <sup>16</sup>. It is a growth-limiting nutrient  
109 for many gut bacteria, which compete for unabsorbed dietary iron in the colon <sup>17</sup>. Lactobacilli,  
110 considered to be beneficial intestinal barrier-maintaining bacteria, playing a significant role in  
111 the inhibition of mucosal colonisation by enteric pathogens, do not require iron <sup>18</sup>. For other  
112 bacteria, acquisition of nutrient iron is an essential step for expression of key virulence factors,  
113 including Gram-negative enteric pathogens within the family *Enterobacteriaceae*, such as  
114 *Salmonella* spp., *Shigella* spp. and *Escherichia coli* pathovars <sup>19</sup>. Consequently, an increase  
115 in unabsorbed dietary iron could favour the growth of opportunistic pathogens over mucosal  
116 barrier-maintaining species and alter the composition of the intestinal microbiota <sup>20</sup>. In the  
117 context of IBD, excess colonic iron concentrations can occur as a result of ulceration and  
118 bleeding, as well as excess unabsorbed iron from oral iron replacement therapy <sup>21</sup>.

119

120 Iron supplementation, either oral or delivered intravenously, has been shown to have an  
121 impact on the intestinal microbiota and metabolome of patients with IBD <sup>10</sup>. Comparison of  
122 oral versus intravenous routes of iron supplementation demonstrated no significant effects on  
123 the human bacterial diversity, although specific species changes were noted. Four Operational  
124 Taxonomic Units (OTUs) were observed to be less abundant after oral iron therapy, including  
125 *Faecalibacterium prausnitzii*, low abundance of which, has been linked to relapse in Crohn's  
126 disease <sup>10</sup>. An OTU of the *Bifidobacterium* genus was noted to be increased with oral iron  
127 therapy but, the effect of prebiotics and probiotics was a confounder in 4/6 patients studied.  
128 Overall, this study suggested that oral iron therapy might have an adverse effect on the  
129 microbiome; however, the contemporaneous effect of IBD was not studied.

130

131 Murine models of IBD offer the opportunity to investigate the gut microbiota and microbial  
132 diversity changes that occur during IBD pathogenesis <sup>22, 23</sup>. We hypothesised that changing  
133 the amount of dietary iron would influence IBD development in a murine model of colitis.  
134 Hence, in this study, we modified the standard chow diet of C57BL/6 mice (at 200 parts per

135 million-ppm iron) to half of the standard levels (100 ppm), or to double that of standard (400  
136 ppm) of iron and subsequently induced colitis using dextran sulfate sodium (DSS).  
137 Clinicopathological outcomes were analyzed in parallel with the characterisation of the  
138 composition of the gut microbial community by sequencing the 16S prokaryotic ribosomal  
139 subunit.

140

141

142

143

144

145

146

147

148

149

150

151

152

153

154

155

156

157

158

159

160

161

162

## 163 **Materials and Methods**

### 164 **Animals**

165 Female C57BL/6 mice (n=130), aged 8-9 weeks old, were purchased from Charles River  
166 Laboratories (Margate, UK). Mice were fed a standard rodent chow pellet diet, during an initial  
167 acclimatisation period of at least one week, with access to water *ad libitum*. All mice were  
168 individually-caged in a specific pathogen-free animal facility with controlled temperature,  
169 humidity and a pre-set dark-light cycle (12 h: 12 h). Eight groups were studied initially; two  
170 control groups and six DSS-treated groups were maintained either for 8 days or up to 10 days.  
171 Three additional control groups of mice (to compare the effects of diets alone) received  
172 drinking water without DSS, but with varying amounts of dietary iron for a total of 10 days,  
173 under conditions as described above (see Table 1). For each set of experiments, mice were  
174 matched for age and body weight. The work described was conducted in accordance with UK  
175 Home Office regulations under the Animals (Scientific Procedures) Act 1986 (ASPA). The  
176 University of Liverpool Ethical Review Body also approved protocols. Study animals were  
177 observed for signs of illness and/or welfare impairment and were euthanised by cervical  
178 dislocation.

179

180 **Table 1:** Experimental animal groups' classification

181

| Iron (ppm)              | 100ppm | 200ppm | 400ppm | 100ppm | 200ppm | 400ppm |
|-------------------------|--------|--------|--------|--------|--------|--------|
| DSS (2% w/v)            | -      | -      | -      | +      | +      | +      |
| Number of mice (day-10) | 6      | 20     | 6      | 14     | 14     | 14     |
| Number of mice (day-8)  | -      | 8      | -      | 16     | 16     | 16     |

182

183

184

## 185 **Diets**

186 The standard 10 mm compression pellet chow diet utilised contained 200 ppm iron (Rat and  
187 Mouse Breeder and Grower Pelleted CRM (P) - Special Diets Services, Witham, Essex, UK).  
188 Two modifications of this diet were used. The first diet was formulated to contain half the  
189 amount of iron found in standard chow, ie. 100 ppm, a dietary level selected to reduce luminal  
190 bacterial exposure to iron without being harmful to the mice. The second formulation contained  
191 double the amount of iron found in standard chow, i.e. 400 ppm, a diet to increase bacterial  
192 exposure to iron without being overtly toxic to mice.

193

## 194 **Induction of acute colitis using dextran sulfate sodium** 195 **(DSS)**

196 Mice were given 2% w/v dextran sodium sulfate (M.W. 36,000 – 50,000Da; Catalogue number:  
197 160110; Lot number: 6683K; MP Biomedicals, UK) in their drinking water for 5 days to induce  
198 colitis (~150 mL/mouse over 5 days), followed by another 5 days of DSS-free drinking water.  
199 Mice were euthanised on day-8 or day-10.

200

## 201 **Histopathological scoring of colonic inflammation**

202 The distal colon was removed, fixed in 4% neutral buffered formalin, dehydrated, paraffin wax-  
203 embedded and then 4 µm sections were cut by microtomy. The sections were stained with  
204 hematoxylin and eosin (H&E), and inflammation scored, using the system described by Bauer  
205 *et al.* <sup>24</sup>.

206



## 207 **Measurement of faecal calprotectin as a marker of the** 208 **degree of intestinal inflammation**

209 Faecal pellets were collected from each cage (1 mice per cage), in all groups, on day 1, 8 and  
210 10. Faecal calprotectin levels were measured using an S100A8/S100A9 ELISA kit  
211 (Immundiagnostik AG, Bensheim; Germany) as per the manufacturer instructions.

212

## 213 **Assessment of faecal iron**

214 The faecal iron (Fe<sup>2+</sup> and Fe<sup>3+</sup>) concentration was measured using an iron immunoassay kit  
215 [MAK025, Sigma-Aldrich]. This was performed using faecal pellets taken at the same time as  
216 those for the faecal calprotectin ELISA.

217

## 218 **High-throughput sequence analysis of bacterial** 219 **communities from faecal samples**

220 Faeces (2 g) was sampled from each animal and bacterial DNA extracted using the Stratec  
221 PSP® Spin Stool DNA Plus Kit (STRATEC Molecular GmbH, Berlin; Germany) following the  
222 manufacturer recommended protocol. Isolated DNA was sent to the Centre for Genomic  
223 Research at the University of Liverpool to generate the 16S Metagenomic Sequencing Library.  
224 Primers described by Caporaso *et al.* <sup>25</sup> were used to amplify the V4 region of 16S rRNA; F:  
225 5'ACACTCTTTCCCTACACGACGCTCTTCCGATCTNNNNNGTGCCAGCMGCCGCGGT  
226 AA3' and R: 5'GTGACTGGAGTTCAGACGTGTGCTCTTCCGATCTGGACTACHVGGGT  
227 WTCTAAT3'.

228

229 Approximately 5 µL of extracted DNA was used for first round PCR with conditions of 20 sec  
230 at 95°C, 15 secs at 65°C, 30 sec at 70°C for 10 cycles then a 5 min final extension at 72°C.  
231 Amplicons were purified with Axygen SPRI Beads before a second-round PCR was performed

232 to incorporate Illumina sequencing adapter sequences containing indexes (i5 and i7) for  
233 sample identification as described in <sup>25</sup>. Fifteen cycles of DNA amplification by PCR were  
234 performed using the same conditions as above, i.e., 25 cycles overall. Again, samples were  
235 purified using Axygen SPRI Beads before being quantified using Qubit and assessed using  
236 the Fragment Analyser. Successfully generated amplicon libraries were used for sequencing.

237

238 The final libraries were pooled in equimolar amounts using the Qubit and Fragment Analyser,  
239 data and size-selected on the Pippin Prep using a size range of 350-550 base pairs (bp). The  
240 quantity and quality of each pool were assessed by Bioanalyzer, and subsequently by qPCR  
241 using the Illumina Library Quantification Kit from Kapa on a Roche Light Cycler LC480II  
242 system according to the manufacturer instructions. The pool of libraries was sequenced on  
243 one lane of the MiSeq at 2 x 250 bp paired-end sequencing <sup>26</sup>. To help balance the complexity  
244 of the amplicon library, 15% PhiX was spiked as described by Altschul *et al.* <sup>27</sup>.

## 245 **Bioinformatics analysis**

246 Initial processing and quality assessment of the sequence data was performed using an in-  
247 house pipeline. Base calling and de-multiplexing of indexed reads were conducted by  
248 CASAVA version 1.8.2 (Illumina) as described by Schubert *et al.* <sup>28</sup>. The raw fastq files were  
249 trimmed to remove Illumina adapter sequences with any reads matching the adapter sequence  
250 over at least 3 bp being trimmed off. The reads were further trimmed to remove low-quality  
251 bases (reads <10 bp were removed). Read pairs were aligned to produce a single sequence  
252 for each read pair that would entirely span the amplicon. Sequences with lengths outside of  
253 the expected range (which are likely to represent errors) were also excluded. Sequences  
254 passing the above filters for each sample were pooled into a single file. A metadata file was  
255 created to describe each sample. These two files were used for metagenomics analysis using  
256 Qiime, version 1.8.0 as described by Caporaso *et al.* <sup>29</sup>. Similar sequences were clustered into  
257 groups, to define OTUs of 97% similarity. OTU-picking was performed using USEARCH7 as  
258 described by Edgar *et al.* <sup>30</sup> to cluster sequences, remove chimeras, and define OTU

259 abundance. The Greengenes database of ribosomal RNA sequences, version 12.8 as  
260 described by McDonald *et al.*<sup>31</sup>, was used as a reference for reference-based chimera  
261 detection. To reduce the effect of sample size and to estimate species richness within each  
262 sample (alpha diversity), OTU tables were repeatedly sub-sampled (rarefied). For each  
263 rarefied OTU table, three measures of alpha diversity were estimated: Chao1, the observed  
264 number of species, and the phylogenetic distance. To allow inter-sample comparisons  
265 (beta-diversity), all datasets were sub-sampled (rarefied). Rarefied OTU tables were used to  
266 calculate weighted and unweighted pair-wise UniFrac matrices. UniFrac matrices were then  
267 used to generate UPGMA (Unweighted Pair-Group Method with Arithmetic mean) trees and  
268 2D principal component analysis (PCA) plots.

269

## 270 **Statistics**

271 Normally distributed physiological and biochemical data (as determined by Shapiro-Wilks  
272 test) were assessed by one-way analysis of variance followed by multiple pairwise  
273 comparisons of treatment means using Dunnett's test. Non-normally distributed data were  
274 assessed by Kruskal-Wallis non-parametric-test followed by multiple pairwise comparisons  
275 (Conover-Inman) test (Stats Direct version 3.0.171; Altrincham, UK).

276

277 For the bioinformatic analysis of microbiota data, Welch's t-test was used with the false  
278 discovery rate (FDR) Storey's multiple correction tests. The q-value is the adjusted p-value  
279 based on FDR calculation, where statistical significance was declared at  $p < 0.05$ .

## 280 Results

### 281 Reduced dietary iron intake is associated with increased 282 weight loss and more severe colitis following the induction 283 of DSS colitis

284 All mice treated with 2% w/v DSS lost body weight from day-5, with maximal weight loss  
285 occurring on day-8. Mice ingesting a diet containing 100 ppm iron lost significantly more weight  
286 ( $13 \pm 1.53\%$ ) than seen with the other DSS treatment groups (i.e.  $8.3 \pm 1.09\%$  for mice  
287 ingesting 200 ppm iron, and  $8.6 \pm 1.33\%$  for mice on 400 ppm iron); see Fig 1. Control mice,  
288 ingesting dietary iron at 100 ppm, 200 ppm and 400 ppm, receiving no DSS treatment, showed  
289 expected steady increases in body weight over the 10-day study period. No evidence of colitis  
290 was observed in all untreated (controls) mice. In contrast, all mice treated with 2% w/v DSS  
291 developed bloody diarrhoea within the last 5 days of the 10-day study. Histopathological  
292 examination established the presence of DSS-induced colitis, which was localised mainly to  
293 the distal part of the colon. Histological features of colitis observed included areas of mucosal  
294 loss, inflammatory cell infiltration and oedema (Fig 2). Histological colonic inflammation  
295 severity scores were significantly greater in mice consuming 100 ppm dietary iron and treated  
296 with 2% w/v DSS, compared with those mice receiving 2% w/v DSS and ingesting a diet  
297 containing 200 ppm or 400 ppm iron, at both day-8 and day-10 (Fig 3).

298

299 **Fig 1. This is the Fig 1 Title: Daily weight changes. This is the Fig 1 legend: Percentage**  
300 **weight change in mice consuming diets containing iron [100 ppm (blue), 200 ppm (red)**  
301 **and 400 ppm (green)] during dextran sulfate sodium (DSS)-induced colitis, and mice**  
302 **consuming a diet containing 200 ppm iron without DSS treatment (orange) during the**  
303 **10-day study period. Data are presented as a mean  $\pm$  standard error of the mean (SEM).**  
304 **Statistical differences were assessed by Kruskal–Wallis test followed by multiple**

305 **comparisons (Conover-Inman) tests (\* p<0.05, \*\* p<0.01, \*\*\* p<0.001, \*\*\*\* p<0.0001).**  
306 **(n=30 female mice per DSS-treated; n=22 mice per untreated group).**

307

308 **Fig 2. This is the Fig 2 Title: H & E histology. This is the Fig 2 legend: Representative**  
309 **Haematoxylin- and eosin-stained sections of the distal colon from untreated and 2%**  
310 **w/v DSS-treated mice. Mice received either water (control, I) or 2% w/v DSS for 5 days**  
311 **followed by another 3 days on plain drinking water (II, III and IV) or 5 days on plain**  
312 **drinking water (V, VI, and VII). Arrowheads highlight submucosal oedema; arrows**  
313 **highlight almost complete loss of colonic epithelium.**

314

315 **Fig 3. This is the Fig 3 Title: Inflammation score. This is the Fig 3 legend: Inflammation**  
316 **(colitis) scores for all groups of DSS-treated mice (n=16 [8-days] and n=14 [10-days]**  
317 **mice per group) and untreated control mice (n=24) on diets containing different levels**  
318 **of iron (100, 200 and 400 ppm). Horizontal lines represent medians. Significant**  
319 **differences were assessed using one-way ANOVA followed by multiple comparisons**  
320 **against untreated control by Dunnett's test; \* p<0.05, \*\* p<0.01, \*\*\*\* p<0.0001.**

321

322

## 323 **Faecal calprotectin concentration in DSS-treated mice** 324 **during the 10-day course**

325 Faecal calprotectin concentrations were measured in faecal pellets collected from the cage of  
326 each mouse in all groups at day-1, day-8, and day-10. Analysis of day-1 samples showed  
327 similar levels (10.3 'mean') in all groups indicating no treatment effects were yet apparent.  
328 Faecal calprotectin concentration data were normalised to the values found in control samples  
329 with higher levels seen in the mice on modified (half and double of the standard content) iron  
330 diet compared to those fed the standard 200 ppm iron diet (Fig 4). This finding was seen at  
331 both day-8 and day-10 although the most striking levels were recorded at day-8 ( $60 \pm 1.11\%$ ,

332 40 ± 1.12% and 80 ± 1.08% increase for the half of the standard, standard and the double of  
333 the standard iron diets, respectively). The maximal faecal calprotectin levels were seen at day-  
334 8 and correlated with the highest histological scores in DSS-treated mice that received 200  
335 ppm and 400 ppm iron containing diets compared to their corresponding day-10 non-DSS  
336 controls (p<0.001).

337

338 **Fig 4. This is the Fig 4 Title: Faecal calprotectin concentrations. This is the Fig 4 legend:**  
339 **Faecal calprotectin concentrations at three different time points (day-1, 8 and 10) for**  
340 **four groups, three DSS-treated groups (consuming diets containing 100, 200 and 400**  
341 **ppm iron) and one untreated control group (consuming a standard 200-ppm iron**  
342 **containing chow diet). Data are presented as a mean ± SEM. Significant differences**  
343 **were identified using the Kruskal–Wallis test followed by multiple comparisons**  
344 **(Conover-Inman) test; \* p<0.05, \*\*\* p<0.001. (30 samples for all DSS-treated groups and**  
345 **22 samples for untreated mice at each time point).**

346

## 347 **Faecal iron concentrations in DSS-treated mice**

348 Faecal iron concentrations were measured to investigate the net impact of dietary iron and  
349 bleeding resulting from inflammation. Faecal pellets, from each mouse, were assessed for  
350 faecal iron concentration (ferric and ferrous) from any (dietary and bleeding) source at the  
351 different time points (day-1, 8 and 10). Data points from experimental groups were normalised  
352 to the values found in the control samples (Fig 5). Faecal iron concentrations were increased,  
353 at day-10, for all mice with DSS-induced colitis, compared to control mice, with the greatest  
354 level of change being observed in mice receiving half of standard chow dietary iron levels, i.e.  
355 100 ppm (Fig 5). DSS-treated mice receiving the standard levels of iron (200-ppm diet) had  
356 significance (P<0.05) faecal iron concentrations at day-8 vs day-8 within the control group of  
357 mice. Observed differences in faecal iron concentrations between mice on half of standard  
358 chow dietary iron levels (100 ppm) and double the standard iron diet levels (400 ppm) were

359 not statistically significant. This suggests that colitis and bleeding likely had more pronounced  
360 effects on the faecal iron concentration than the amount of iron consumed in the diet alone.

361

362 **Fig 5. This is the Fig 5 Title: Faecal iron concentrations. This is the Fig 5 legend: Faecal**  
363 **iron concentration at three different time points (day-1, 8 and 10) for four groups, three**  
364 **DSS-treated groups (consuming diets containing 100, 200 and 400 ppm iron) and one**  
365 **untreated control group (consuming a standard 200-ppm iron containing chow diet).**  
366 **Data are presented as a mean  $\pm$  SEM. Significant differences were identified using the**  
367 **Kruskal–Wallis test followed by multiple comparisons (Conover-Inman) test; \*  $p < 0.05$ .**

368

## 369 **Effect of iron on the microbiota composition in the colon** 370 **after DSS-induced colitis**

371 To determine the effect of DSS and oral iron on the gut microbiota, fresh faecal samples were  
372 compared at baseline and the end of each experiment (after 10 days from the start). After  
373 sequence processing and filtering, a total of 11,811,301 chimera-checked 16S rRNA  
374 sequences ( $166,356 \pm 59,353$  per sample) spanning a total of 204,331 OTUs were obtained.

375

376 Analysis of alpha-diversity (statistical significance of Shannon) indicated that there was a  
377 significant reduction in species richness in faecal samples taken from the 400 ppm iron fed,  
378 the DSS-treated group between day-1 and day-10 ( $P < 0.0066$ ; Shannon diversity index) (Fig  
379 6-a). To assess whether the differences in species richness were attributable to alterations in  
380 the relative abundance of specific bacterial groups, we compared the proportions of various  
381 taxonomic groups at the phylum level. Bacteroidetes was the most abundant phyla present,  
382 followed by Firmicutes, Cyanobacteria and Proteobacteria (Table 2). Phyla changes were  
383 seen in all DSS-treated groups when day-10 samples were compared to day-1. However,  
384 these changes were only observed to be statistically significant for the mice consuming 400  
385 ppm iron, with increases observed in the numbers of Proteobacteria (increased  $1.40 \pm 0.1$ -

386 fold) and Actinobacteria (1.30 ± 0.1-fold increase) and concomitant reductions in Firmicutes  
 387 (0.6 ± 0.1-fold) and Bacteroidetes (0.8 ± 0.04-fold); these changes have been explicitly  
 388 accredited to Proteobacteria, Actinobacteria, Firmicutes and Bacteroidetes, which occurred in  
 389 the presence of inflamed versus non-inflamed tissues even within the same group. Therefore,  
 390 the double of the standard iron diet group had the highest relative abundance among inflamed  
 391 (colitis) groups on the subject of reduction or increase changes (day-1 vs day-10) (Table 2  
 392 and Fig 6-b).

393

394 **Table 2:** Comparison between all groups regarding proportions of bacteria at the phylum level at  
 395 day-1 vs day-10

396

| Taxonomy       | Control Day-1 | Control Day-10 | 100ppm DSS Day-1 | 100ppm DSS Day-10 | 200ppm DSS Day-1 | 200ppm DSS Day-10 | 400ppm DSS Day-1 | 400ppm DSS Day-10 |
|----------------|---------------|----------------|------------------|-------------------|------------------|-------------------|------------------|-------------------|
| Actinobacteria | 6.63%         | 7.25%          | 6.77%            | 8.48%             | 7%               | 9.28%             | 7.35%            | 9.82%             |
| Bacteroidetes  | 27.03%        | 24.98%         | 30.38%           | 30.73%            | 32%              | 31.33%            | 34.62%           | 27.27%            |
| Cyanobacteria  | 19.13%        | 22.02%         | 19.80%           | 25.67%            | 20%              | 27.87%            | 20.70%           | 30.23%            |
| Firmicutes     | 26.98%        | 24.15%         | 21.33%           | 6.20%             | 20%              | 10.2%             | 15.57%           | 6.22%             |
| Proteobacteria | 13.22%        | 15.17%         | 13.85%           | 17.55%            | 15%              | 19.65%            | 14.82%           | 20.58%            |
| TM7            | 1.63%         | 1.63%          | 1.65%            | 2.02%             | 2%               | 2.27%             | 1.80%            | 2.48%             |
| Tenericutes    | 2.42%         | 1.90%          | 3.55%            | 0.45%             | 1%               | 0.15%             | 2.53%            | 0.07%             |

397

398

399 **Fig 6. This is the Fig 6 Title: Relative abundance of bacteria. This is the Fig 6 legend:**  
 400 **Effect of iron on the microbiota composition in the colon after DSS-induced colitis. (a)**  
 401 **Shannon effective diversity boxplots display decreased numbers of dominant**  
 402 **molecular species in all groups, day-1 versus day-10 of the study. (b) The Phylum-level**  
 403 **taxonomic composition of all samples (average relative abundance). Ctr. = untreated**



404 **controls on a standard chow diet containing 200 ppm iron; DSS = 2% w/v dextran sulfate**  
405 **sodium (DSS) treated mice on diets containing low iron (100 ppm), standard iron (200**  
406 **ppm) and high iron (400 ppm) levels.**

407

408 We searched for differences between day-1 and day-10 samples by considering delta-values  
409 calculated as differences in sequence abundances (before and after treatment). No,  
410 statistically significant changes were observed in mice receiving diets containing half of the  
411 standard iron levels where DSS was administered, despite showing similar trends to those  
412 mice on double the standard diet iron levels (Fig 7).

413

414 **Fig 7. This is the Fig 7 Title: Proportions of sequences. This is the Fig 7 legend: Box**  
415 **plot is showing the distribution in the proportion of four key phyla (Firmicutes,**  
416 **Bacteroidetes, Actinobacteria and Proteobacteria) assigned to samples from all groups**  
417 **at day-1 and day-10. Boxes indicate the interquartile ranges (75<sup>th</sup> to 25<sup>th</sup> IQR) of the data.**  
418 **The median values are shown as lines within the box, and the mean values are indicated**  
419 **by stars. Whiskers extend to the most extreme value within 1.5\*IQR. Outliers are shown**  
420 **as crosses. Statistical differences were assessed by Welch's t-test followed by Storey's**  
421 **FDR multiple test correction.**

422

423 Principal Component Analysis (PCA) was used to identify linear combinations of gut microbial  
424 taxa that were associated with specific diets. There was a clear separation of samples from  
425 the mice consuming a chow diet containing 400 ppm before (day-1) and after (day-10) DSS-  
426 treatment which was not seen in the other treatment groups (Fig 8). This suggests that DSS-  
427 induced colitis, in the presence of double the standard level of dietary iron intake, affected the  
428 bacterial community significantly more than that observed in all other diet groups ( $P < 0.0066$ ;  
429 Shannon diversity index) (Fig 6-a).

430

431 **Fig 8. This is the Fig 8 Title: Principal Coordinate/Component Analysis. This is the Fig**  
432 **8 legend: Analysis of faecal microbiota shifts assessed by Principal**  
433 **Coordinate/Component Analysis (PCA-PCoA) plots of the unweighted UniFrac**  
434 **distances of pre-and post-DSS-intervention stool samples (I) PCoA ; all groups (II) PCA;**  
435 **DSS-treated mice on diets containing low iron (100 ppm), standard iron (200 ppm) and**  
436 **high iron (400 ppm) (b, c, and d respectively) and untreated control mice on a diet**  
437 **containing standard 200 ppm iron (a) at phylum-level, phylogenetic classification of 16S**  
438 **rRNA gene sequences. Symbols represent data from individual mice, colour-coded by**  
439 **the indicated metadata. Statistical differences were assessed by Welch's t-test followed**  
440 **by Storey's FDR multiple test correction.**

441

442

443

444

445

446

447

448

449

450

451

452

453

454

455

456

## 457 Discussion

458 In this study, we used a murine model of IBD in which 2% w/v DSS was administered to mice  
459 and investigated the impact of changing dietary iron intake on the degree of inflammation and  
460 the bacterial components of the intestinal microbiome.

461

462 Alteration of iron content from standard chow diet levels (200 ppm) significantly influenced the  
463 severity of colitis induced by DSS in mice. Clinically, for mice treated with DSS, those fed half  
464 the standard iron levels developed more severe colitis (compared to those consuming chow  
465 diets with iron levels at 200 ppm, or at higher levels of 400 ppm. DSS-treated mice that  
466 received 100 ppm dietary iron significantly also lost more body weight than observed in the  
467 other treatment groups. However, at molecular level increasing dietary iron 2-fold above  
468 standard levels, to 400 ppm, led to worse inflammation and greater faecal calprotectin  
469 concentrations at day-8, than was found in mice consuming a 100 ppm iron diet. Our  
470 observation agrees with the findings of an earlier study performed by Carrier and colleagues  
471 <sup>32</sup> in DSS-treated rats which emphasised the role of nutrient iron in modulating inflammation.  
472 Specifically, the severity of colitis appeared to positively associate with the amount of iron  
473 consumed. However, they did not investigate the effects of consumption of lower than normal  
474 amounts of iron in their work <sup>32</sup>. A study by Erichsen *et al.* <sup>33</sup> reported that the addition of low-  
475 dose oral ferrous fumarate (0.60 mg Fe/kg/d) to Wistar rats to levels present in standard chow  
476 130 mg/kg (ferrous carbonate, 40 mg/kg; the remainder representing organic iron), also  
477 increased the severity of DSS-induced colitis. In the same study, oral supplementation with  
478 higher doses of ferrous fumarate caused a further increase in histological intestinal  
479 inflammation <sup>33</sup>. Our study shows that a diet depleted in iron (100 ppm) can also exacerbate  
480 colitis severity. The mice that consumed a diet containing 100 ppm iron, and treated with 2%  
481 w/v DSS, showed greater increased intestinal inflammation than mice ingesting a standard  
482 chow diet containing 200ppm iron, and treatment with 2% w/v DSS.

483 It has previously been suggested that iron formulations can be beneficial (ferrous bisglycinate)  
484 or highly damaging (ferric ethylenediaminetetraacetic acid (FEDTA)) during DSS-induced  
485 colitis experiments <sup>9</sup>. Iron supplementation at different doses also induced shifts in the gut  
486 microbial community and inferred metabolic pathways <sup>9</sup>. Our findings indicate that any  
487 significant alteration in standard dietary iron (above or below the standard chow levels of 200  
488 ppm) may have a negative impact on the severity of DSS-induced colitis in mice.

489

490 For humans, faecal calprotectin measurement is commonly used as an assessment tool for  
491 disease activity in IBD <sup>34, 35</sup>. We, therefore, used this additional approach and measured  
492 murine faecal calprotectin levels to examine whether dietary iron levels affected inflammation.  
493 The degree of colonic inflammation was found to be significantly higher for DSS-treated mice  
494 receiving 400 ppm iron in their chow as assessed by faecal calprotectin concentration. The  
495 histopathological changes observed were consistent with the faecal calprotectin levels  
496 measured, which were higher at day-8 than at day-10, particularly in the high- and low-iron  
497 fed, DSS-treated groups. A previous study in African infants by Jaeggi and colleagues <sup>36</sup> also  
498 noted that oral iron supplementation was associated with increased concentrations of faecal  
499 calprotectin and with an increased rate of diarrhoea <sup>36</sup>. In contrast, a mouse study by Kortman  
500 *et al.*<sup>37</sup> showed that faecal calprotectin concentrations were not influenced by dietary iron  
501 intervention alone, but only following an enteric infection (*Citrobacter rodentium*), with faecal  
502 calprotectin concentrations being significantly lower in mice consuming an iron-deficient diet.  
503 Kortman *et al.* <sup>37</sup> also found that Gram-positive *Enterorhabdus* appeared only after enteric  
504 infection and its relative abundance, and faecal calprotectin concentrations observed, were  
505 highest in a standard (45 mg/kg) dietary iron group <sup>37</sup>.

506

507 In the present study, all DSS-treated mice showed an increase in faecal calprotectin levels at  
508 day-8; this was most prominent in the mice consuming 400 ppm dietary iron. However, all  
509 DSS-treated groups showed greater levels of calprotectin in their stool at day-8 vs day-10.

510 This further supports the view that altering the standard levels of dietary iron may exacerbate  
511 the severity of murine DSS-induced colitis.

512

513 One key source of iron accessible to the intestinal microbiota is unabsorbed, excess dietary  
514 iron and any significant changes in luminal iron concentrations may have a potential impact  
515 on structure, function and diversity of the intestinal microbiome<sup>36, 38</sup>. Iron replacement therapy  
516 is a common treatment in patients with anaemia and IBD, such as in Crohn's disease, although  
517 such supplements may also influence intestinal inflammation as well as intestinal microbial  
518 community structure and function<sup>32, 39</sup>.

519

520 Measuring faecal iron concentrations would help to assess the severity of bleeding during  
521 colitis. However, it is difficult to distinguish between the iron that comes from the diet and that  
522 which has been released from red blood cells because of luminal bleeding during colitis.  
523 Following a collection of faecal pellets at different time points from each mouse and calculating  
524 the iron content (ferric and ferrous) (dietary and bleeding source) and comparing results  
525 observed between groups at day-10, the absolute amount of faecal iron appeared to be  
526 different for DSS-treated groups (3.3 -fold increase in half of the standard iron group, and 2.3-  
527 fold increase in the double the standard iron group compared with the control group at day-  
528 10). There was a significant increase in faecal iron at day-8, in standard iron diet group, but  
529 not in the other groups. As there was as if an to increased (no significance) in faecal iron in  
530 mice fed 100 ppm iron compared with those mice fed the standard chow diet level of 200 ppm,  
531 this suggests that luminal bleeding may be a contributing factor to faecal iron quantitation in  
532 the DSS-induced colitis model.

533

534 Overall in this study, changes (increase or decrease) in the iron content of the diet from  
535 standard chow levels (200 ppm) appeared to significantly enhance colonic inflammation in a  
536 DSS-induced mouse model of IBD. There appeared to be synergy between dietary iron levels  
537 and DSS treatment of colonic inflammation and faecal calprotectin levels. Faecal iron

538 concentrations are known to be increased by inflammation, as well as oral iron intake<sup>36</sup>. This  
539 may explain the paradox in the half standard dietary iron fed group where luminal bleeding  
540 during colitis caused an increase in the faecal iron concentration despite lower levels of iron  
541 being consumed in the diet.

542

543 Changes in the microbiota are thought to be a major contributory factor in many human  
544 diseases, including IBD<sup>40, 41</sup>. The most distinct phylum level alterations in IBD are a reduction  
545 in the abundance of Bacteroidetes and Firmicutes and increased proportions of  
546 Proteobacteria, in particular, increased numbers of bacteria from the family  
547 *Enterobacteriaceae*<sup>14, 40, 42, 43</sup>. Murine models of IBD provide a means to investigate bacteria  
548 in IBD<sup>22</sup>, and dysbiosis of the intestinal microbiota has been shown to induce murine colitis<sup>23</sup>,  
549<sup>44</sup>. Here, we analysed inter- and intra-group differences and similarities between the intestinal  
550 microbiota composition of 24 laboratory C57BL/6 mice (6 mice/group). Qualitative and  
551 quantitative-based analysis of the faecal gut microbiota at two different time points (day-1 and  
552 10) for DSS-treated groups (100, 200 and 400 ppm dietary iron) and untreated mice (controls)  
553 was undertaken. Principal component analysis indicated an overlap of all microbial profiles,  
554 except for the double standard dietary iron (400 ppm) fed DSS-treated mice. Based on the  
555 PCA, ingestion of double the standard level of dietary iron was found to be the most important  
556 factor responsible for clustering.

557

558 Some studies have shown that subsets of CD and UC intestinal tissue and faecal samples  
559 have an abnormal gut microbiota, characterised by depletion of commensal bacteria, in  
560 particular members of the phyla Firmicutes and Bacteroidetes, and an increase in  
561 Proteobacteria<sup>14, 43</sup>. Doubling the standard level of iron in the chow diet (i.e. to 400ppm) here  
562 led to significant alterations in microbiota composition in 2% w/v DSS-treated mice, with our  
563 study showing a similar pattern of change to those observed in human IBD, including  
564 increases in Proteobacteria and concomitant decreases in Firmicutes and Bacteroidetes.  
565 Similar trends were found in the other DSS-treated groups of mice, but these changes in

566 microbiota composition did not reach statistical significance. An increase in the iron content of  
567 the diet changed the microbiota after colitis was induced with DSS, which was not observed  
568 in the standard or lower dietary iron groups. A shifting balance within the intestinal microbiota  
569 could alter host immune response and open niches for the establishment of key  
570 environmental-shaping bacteria in the intestine, for example, the significant decrease in  
571 numbers of beneficial Firmicutes could create an opportunity for, and encourage the growth  
572 of potential gut pathogens <sup>45</sup>. Bacteria species within the Firmicutes phylum are predominant  
573 in the generation of short-chain fatty acids, particularly butyrate, from dietary metabolism of  
574 insoluble fibre, resistant starches and fermentable soluble fibres (non-starch polysaccharides),  
575 <sup>46</sup>, thereby providing a key anti-inflammatory effectors to ameliorate animal models of colitis  
576 <sup>47</sup>.

577

578 This is the first study to use models of colitis to contemporaneously assess the influence of  
579 dietary iron content on both disease activity and the microbiome. It emphasises the detrimental  
580 effects of both halving and doubling the amount of iron in the diet on a murine model of IBD.  
581 The diet with double the standard level of iron (400 ppm) led to key changes in the microbiome  
582 and this would imply that these changes observed were not simply driven by the severity of  
583 inflammation, but rather that luminal free iron can also contribute to the complex interaction  
584 of factors that lead to the development of a dysbiotic state as has frequently been observed  
585 in IBD. There is more to understand how all sources of luminal iron influence IBD.  
586 Furthermore, work is needed to outline the physiological impact on the gut microbiota resultant  
587 from increased availability of luminal iron and how this may affect bacterial phyla and diversity.  
588 Future intervention studies in humans will be invaluable to further define the complex effects  
589 of different doses of therapeutic oral iron on the human gut microbiota, particularly to  
590 understand the metabolic consequences of observed phyla changes.

591

592

593

## 594 **References:**

595

- 596 1. Kulnigg S, Teischinger L, Dejaco C, et al. Rapid recurrence of IBD-associated anemia and iron  
597 deficiency after intravenous iron sucrose and erythropoietin treatment. *Am J Gastroenterol*  
598 2009;104:1460-7.
- 599 2. Manfred Wick WP, Paul Lehmann. *Clinical Aspects and Laboratory – Iron Metabolism*.  
600 SpringerWienNewYork: Springer Vienna, 2011.
- 601 3. Stein J, Dignass AU. Management of iron deficiency anemia in inflammatory bowel disease - a  
602 practical approach. *Ann Gastroenterol* 2013;26:104-113.
- 603 4. Rizvi S, Schoen RE. Supplementation with oral vs. intravenous iron for anemia with IBD or  
604 gastrointestinal bleeding: is oral iron getting a bad rap? *Am J Gastroenterol* 2011;106:1872-9.
- 605 5. Lee TW, Kolber MR, Fedorak RN, et al. Iron replacement therapy in inflammatory bowel  
606 disease patients with iron deficiency anemia: a systematic review and meta-analysis. *J Crohns*  
607 *Colitis* 2012;6:267-75.
- 608 6. Carrier J, Aghdassi E, Platt I, et al. Effect of oral iron supplementation on oxidative stress and  
609 colonic inflammation in rats with induced colitis. *Aliment Pharmacol Ther* 2001;15:1989-99.
- 610 7. Lobo V, Patil A, Phatak A, et al. Free radicals, antioxidants and functional foods: Impact on  
611 human health. *Pharmacogn Rev* 2010;4:118-26.
- 612 8. Ponka P, Lok CN. The transferrin receptor: role in health and disease. *Int J Biochem Cell Biol*  
613 1999;31:1111-37.
- 614 9. Constante M, Fragoso G, Lupien-Meilleur J, et al. Iron Supplements Modulate Colon  
615 Microbiota Composition and Potentiate the Protective Effects of Probiotics in Dextran Sodium  
616 Sulfate-induced Colitis. *Inflamm Bowel Dis* 2017;23:753-766.
- 617 10. Lee T, Clavel T, Smirnov K, et al. Oral versus intravenous iron replacement therapy distinctly  
618 alters the gut microbiota and metabolome in patients with IBD. *Gut* 2017;66:863-871.
- 619 11. Rastall RA. Bacteria in the gut: friends and foes and how to alter the balance. *J Nutr*  
620 2004;134:2022S-2026S.
- 621 12. Bik EM. Composition and function of the human-associated microbiota. *Nutr Rev* 2009;67  
622 Suppl 2:S164-71.
- 623 13. Mukhopadhyay I, Hansen R, El-Omar EM, et al. IBD-what role do Proteobacteria play? *Nat Rev*  
624 *Gastroenterol Hepatol* 2012;9:219-30.
- 625 14. Frank DN, St Amand AL, Feldman RA, et al. Molecular-phylogenetic characterization of  
626 microbial community imbalances in human inflammatory bowel diseases. *Proc Natl Acad Sci*  
627 *U S A* 2007;104:13780-5.
- 628 15. Matsuoka K, Kanai T. The gut microbiota and inflammatory bowel disease. *Semin*  
629 *Immunopathol* 2015;37:47-55.
- 630 16. Weiss G, Wachter H, Fuchs D. Linkage of cell-mediated immunity to iron metabolism. *Immunol*  
631 *Today* 1995;16:495-500.
- 632 17. Andrews SC, Robinson AK, Rodriguez-Quinones F. Bacterial iron homeostasis. *FEMS Microbiol*  
633 *Rev* 2003;27:215-37.
- 634 18. Naikare H, Palyada K, Panciera R, et al. Major role for FeoB in *Campylobacter jejuni* ferrous  
635 iron acquisition, gut colonization, and intracellular survival. *Infect Immun* 2006;74:5433-44.
- 636 19. Lee SH, Shinde P, Choi J, et al. Effects of dietary iron levels on growth performance,  
637 hematological status, liver mineral concentration, fecal microflora, and diarrhea incidence in  
638 weanling pigs. *Biol Trace Elem Res* 2008;126 Suppl 1:S57-68.
- 639 20. Reid CA HK. The effects of retrogradation and amylose/amylopectin ratio of starches on  
640 carbohydrate fermentation and microbial populations in the porcine colon. *Animal Science*  
641 1999;68:503-510.



- 642 21. Uritski R, Barshack I, Bilkis I, et al. Dietary iron affects inflammatory status in a rat model of  
643 colitis. *J Nutr* 2004;134:2251-5.
- 644 22. Rooks MG, Veiga P, Wardwell-Scott LH, et al. Gut microbiome composition and function in  
645 experimental colitis during active disease and treatment-induced remission. *ISME J*  
646 2014;8:1403-17.
- 647 23. Garrett WS, Lord GM, Punit S, et al. Communicable ulcerative colitis induced by T-bet  
648 deficiency in the innate immune system. *Cell* 2007;131:33-45.
- 649 24. Bauer C, Duesell P, Mayer C, et al. Colitis induced in mice with dextran sulfate sodium (DSS)  
650 is mediated by the NLRP3 inflammasome. *Gut* 2010;59:1192-9.
- 651 25. Caporaso JG, Lauber CL, Walters WA, et al. Global patterns of 16S rRNA diversity at a depth of  
652 millions of sequences per sample. *Proc Natl Acad Sci U S A* 2011;108 Suppl 1:4516-22.
- 653 26. Magoc T, Salzberg SL. FLASH: fast length adjustment of short reads to improve genome  
654 assemblies. *Bioinformatics* 2011;27:2957-63.
- 655 27. Altschul SF, Gish W, Miller W, et al. Basic local alignment search tool. *J Mol Biol* 1990;215:403-  
656 10.
- 657 28. Schubert M, Lindgreen S, Orlando L. AdapterRemoval v2: rapid adapter trimming,  
658 identification, and read merging. *BMC Res Notes* 2016;9:88.
- 659 29. Caporaso JG, Kuczynski J, Stombaugh J, et al. QIIME allows analysis of high-throughput  
660 community sequencing data. *Nat Methods* 2010;7:335-6.
- 661 30. Edgar RC. Search and clustering orders of magnitude faster than BLAST. *Bioinformatics*  
662 2010;26:2460-1.
- 663 31. McDonald D, Price MN, Goodrich J, et al. An improved Greengenes taxonomy with explicit  
664 ranks for ecological and evolutionary analyses of bacteria and archaea. *ISME J* 2012;6:610-8.
- 665 32. Carrier JC, Aghdassi E, Jeejeebhoy K, et al. Exacerbation of dextran sulfate sodium-induced  
666 colitis by dietary iron supplementation: role of NF-kappaB. *Int J Colorectal Dis* 2006;21:381-7.
- 667 33. Erichsen K, Milde AM, Arslan G, et al. Low-dose oral ferrous fumarate aggravated intestinal  
668 inflammation in rats with DSS-induced colitis. *Inflamm Bowel Dis* 2005;11:744-8.
- 669 34. Kopylov U, Rosenfeld G, Bressler B, et al. Clinical utility of fecal biomarkers for the diagnosis  
670 and management of inflammatory bowel disease. *Inflamm Bowel Dis* 2014;20:742-56.
- 671 35. Henderson P, Casey A, Lawrence SJ, et al. The diagnostic accuracy of fecal calprotectin during  
672 the investigation of suspected pediatric inflammatory bowel disease. *Am J Gastroenterol*  
673 2012;107:941-9.
- 674 36. Jaeggi T, Kortman GA, Moretti D, et al. Iron fortification adversely affects the gut microbiome,  
675 increases pathogen abundance and induces intestinal inflammation in Kenyan infants. *Gut*  
676 2015;64:731-42.
- 677 37. Kortman GA, Mulder ML, Richters TJ, et al. Low dietary iron intake restrains the intestinal  
678 inflammatory response and pathology of enteric infection by food-borne bacterial pathogens.  
679 *Eur J Immunol* 2015;45:2553-67.
- 680 38. Guarner F. Enteric flora in health and disease. *Digestion* 2006;73 Suppl 1:5-12.
- 681 39. Werner T, Wagner SJ, Martinez I, et al. Depletion of luminal iron alters the gut microbiota and  
682 prevents Crohn's disease-like ileitis. *Gut* 2011;60:325-33.
- 683 40. Hold GL, Smith M, Grange C, et al. Role of the gut microbiota in inflammatory bowel disease  
684 pathogenesis: what have we learnt in the past 10 years? *World J Gastroenterol* 2014;20:1192-  
685 210.
- 686 41. Sartor RB. Gut microbiota: Diet promotes dysbiosis and colitis in susceptible hosts. *Nat Rev*  
687 *Gastroenterol Hepatol* 2012;9:561-2.
- 688 42. Hill DA, Artis D. Intestinal bacteria and the regulation of immune cell homeostasis. *Annu Rev*  
689 *Immunol* 2010;28:623-67.
- 690 43. Manichanh C, Rigottier-Gois L, Bonnaud E, et al. Reduced diversity of faecal microbiota in  
691 Crohn's disease revealed by a metagenomic approach. *Gut* 2006;55:205-11.

- 692 44. Bleich A, Hansen AK. Time to include the gut microbiota in the hygienic standardisation of  
693 laboratory rodents. *Comp Immunol Microbiol Infect Dis* 2012;35:81-92.
- 694 45. Zimmermann MB, Chassard C, Rohner F, et al. The effects of iron fortification on the gut  
695 microbiota in African children: a randomized controlled trial in Cote d'Ivoire. *Am J Clin Nutr*  
696 2010;92:1406-15.
- 697 46. Barcenilla A, Pryde SE, Martin JC, et al. Phylogenetic relationships of butyrate-producing  
698 bacteria from the human gut. *Appl Environ Microbiol* 2000;66:1654-61.
- 699 47. Hung TV, Suzuki T. Dietary Fermentable Fiber Reduces Intestinal Barrier Defects and  
700 Inflammation in Colitic Mice. *J Nutr* 2016;146:1970-1979.

701

702

703

704

705

706

707

708

709

710

711

712

713

714

715

716

717

718

719

720

721

722

723

# Daily weight changes

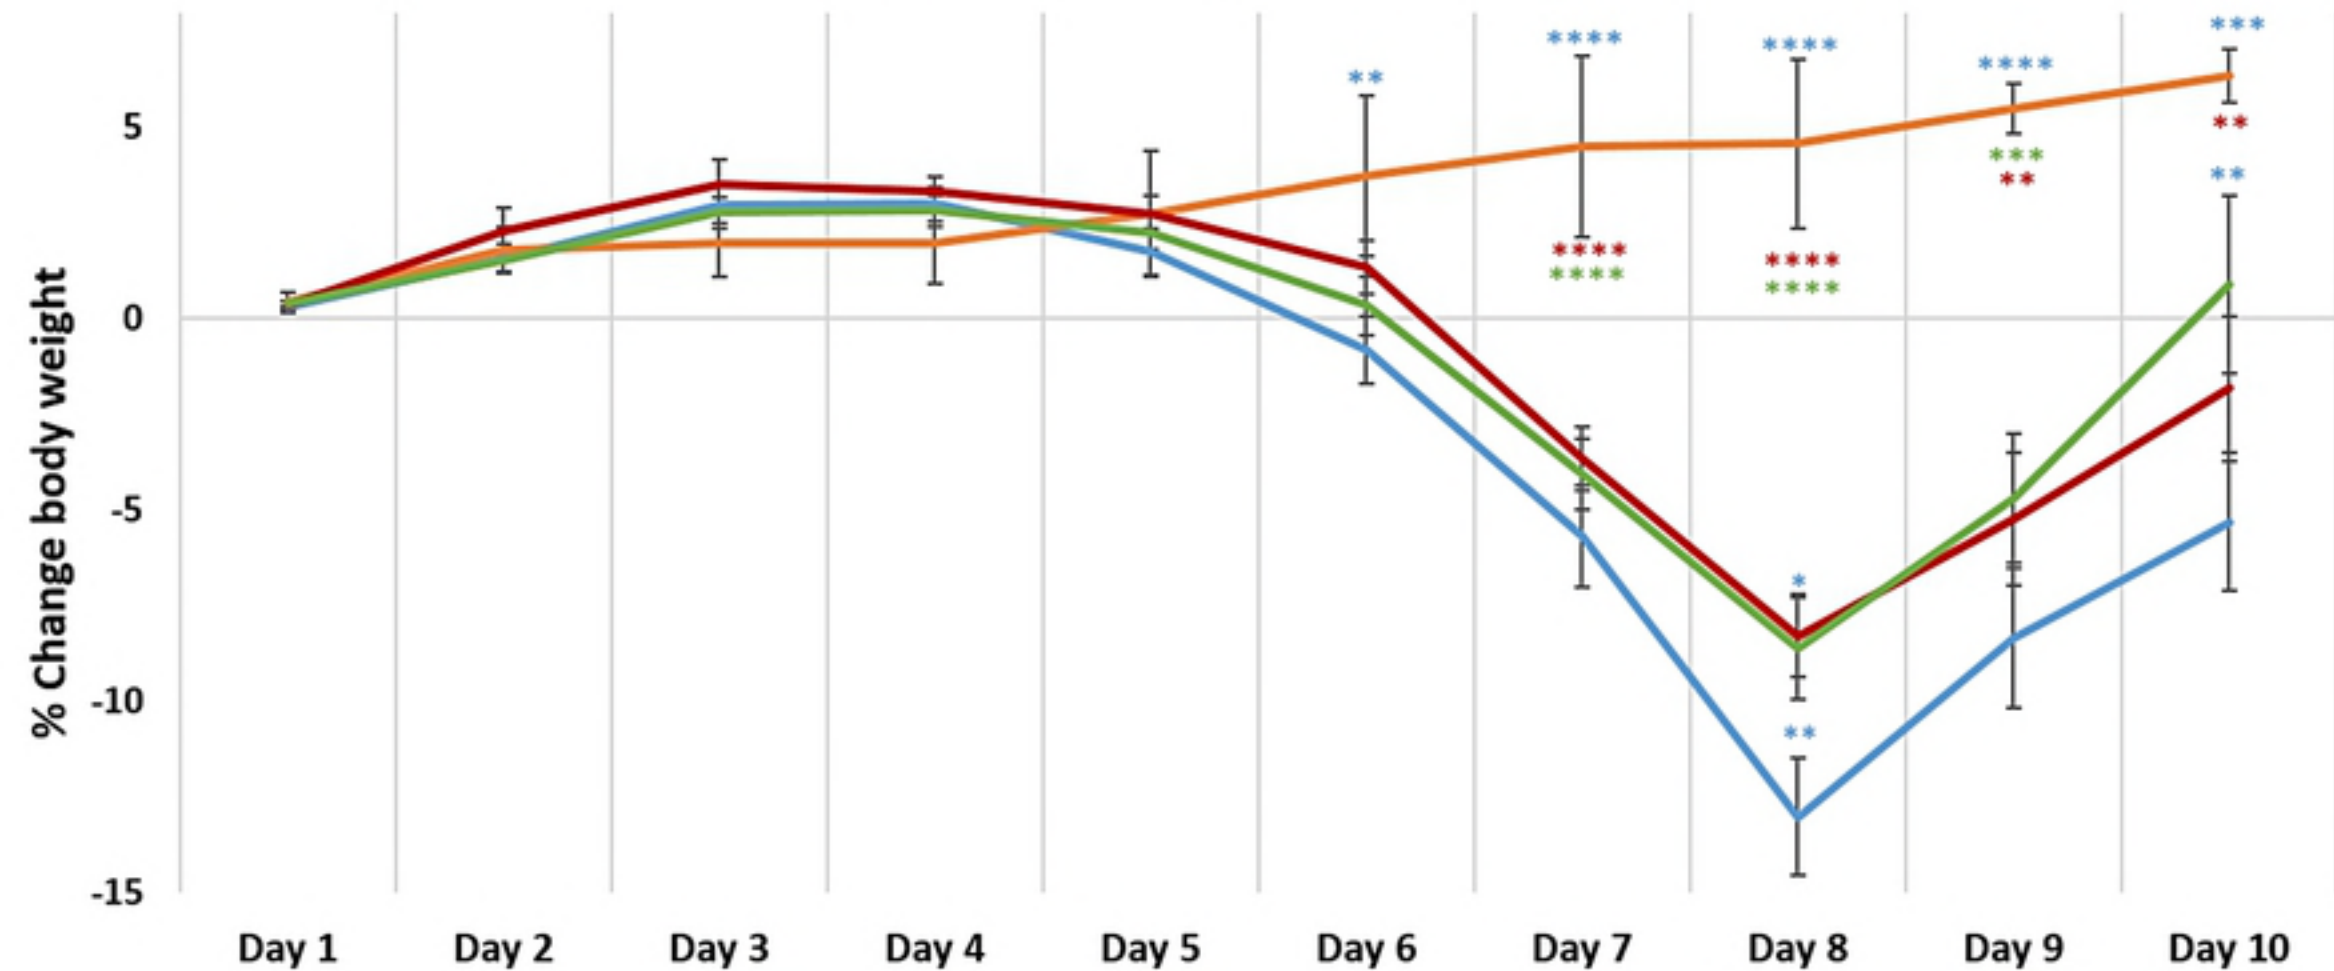

|                   |            |            |            |            |
|-------------------|------------|------------|------------|------------|
| <b>Iron (PPM)</b> | <b>100</b> | <b>200</b> | <b>200</b> | <b>400</b> |
| <b>DSS (2%)</b>   | <b>+</b>   | <b>-</b>   | <b>+</b>   | <b>+</b>   |

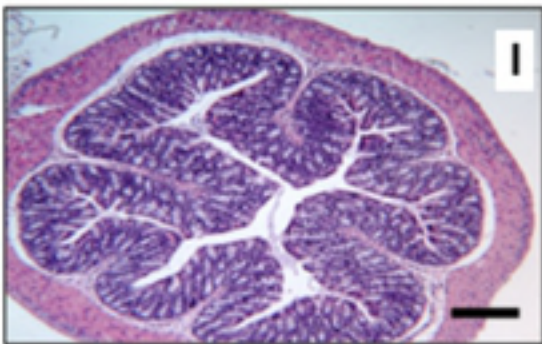

100ppm iron + 2% DSS

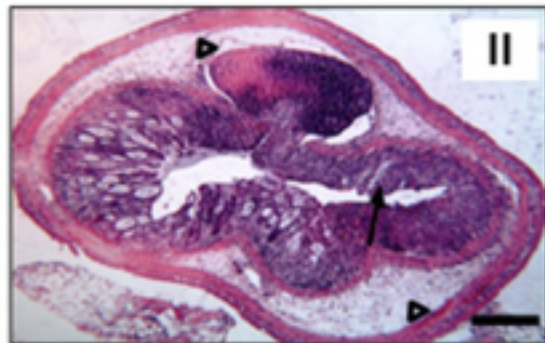

200ppm iron + 2% DSS

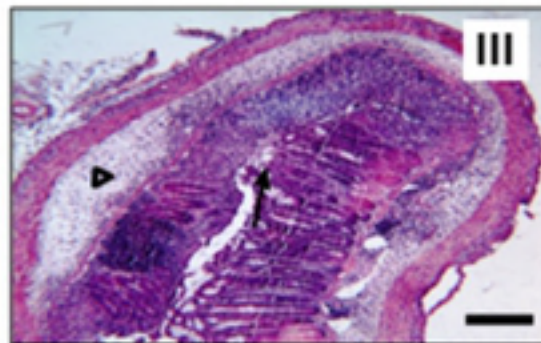

400ppm iron + 2% DSS

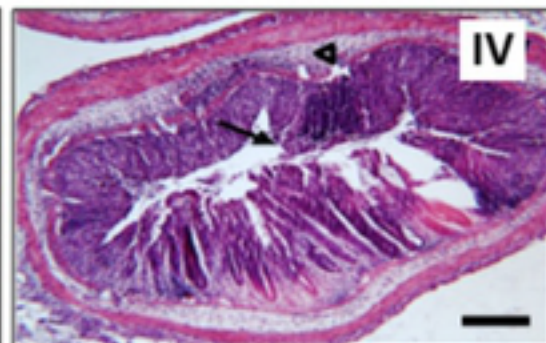

DAY 8

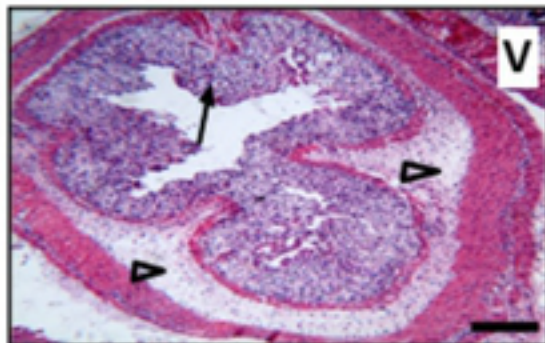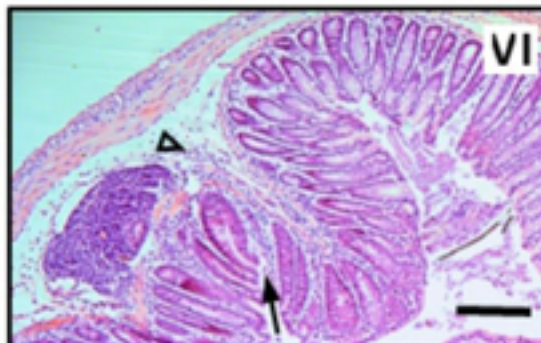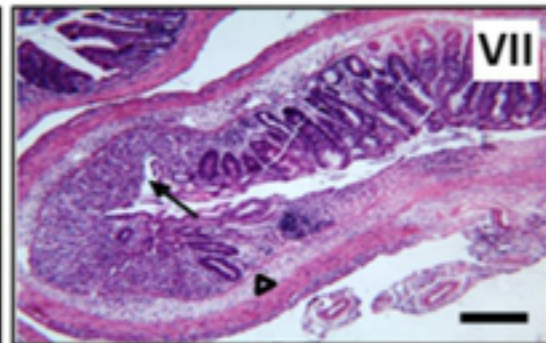

DAY 10



Inflammation score

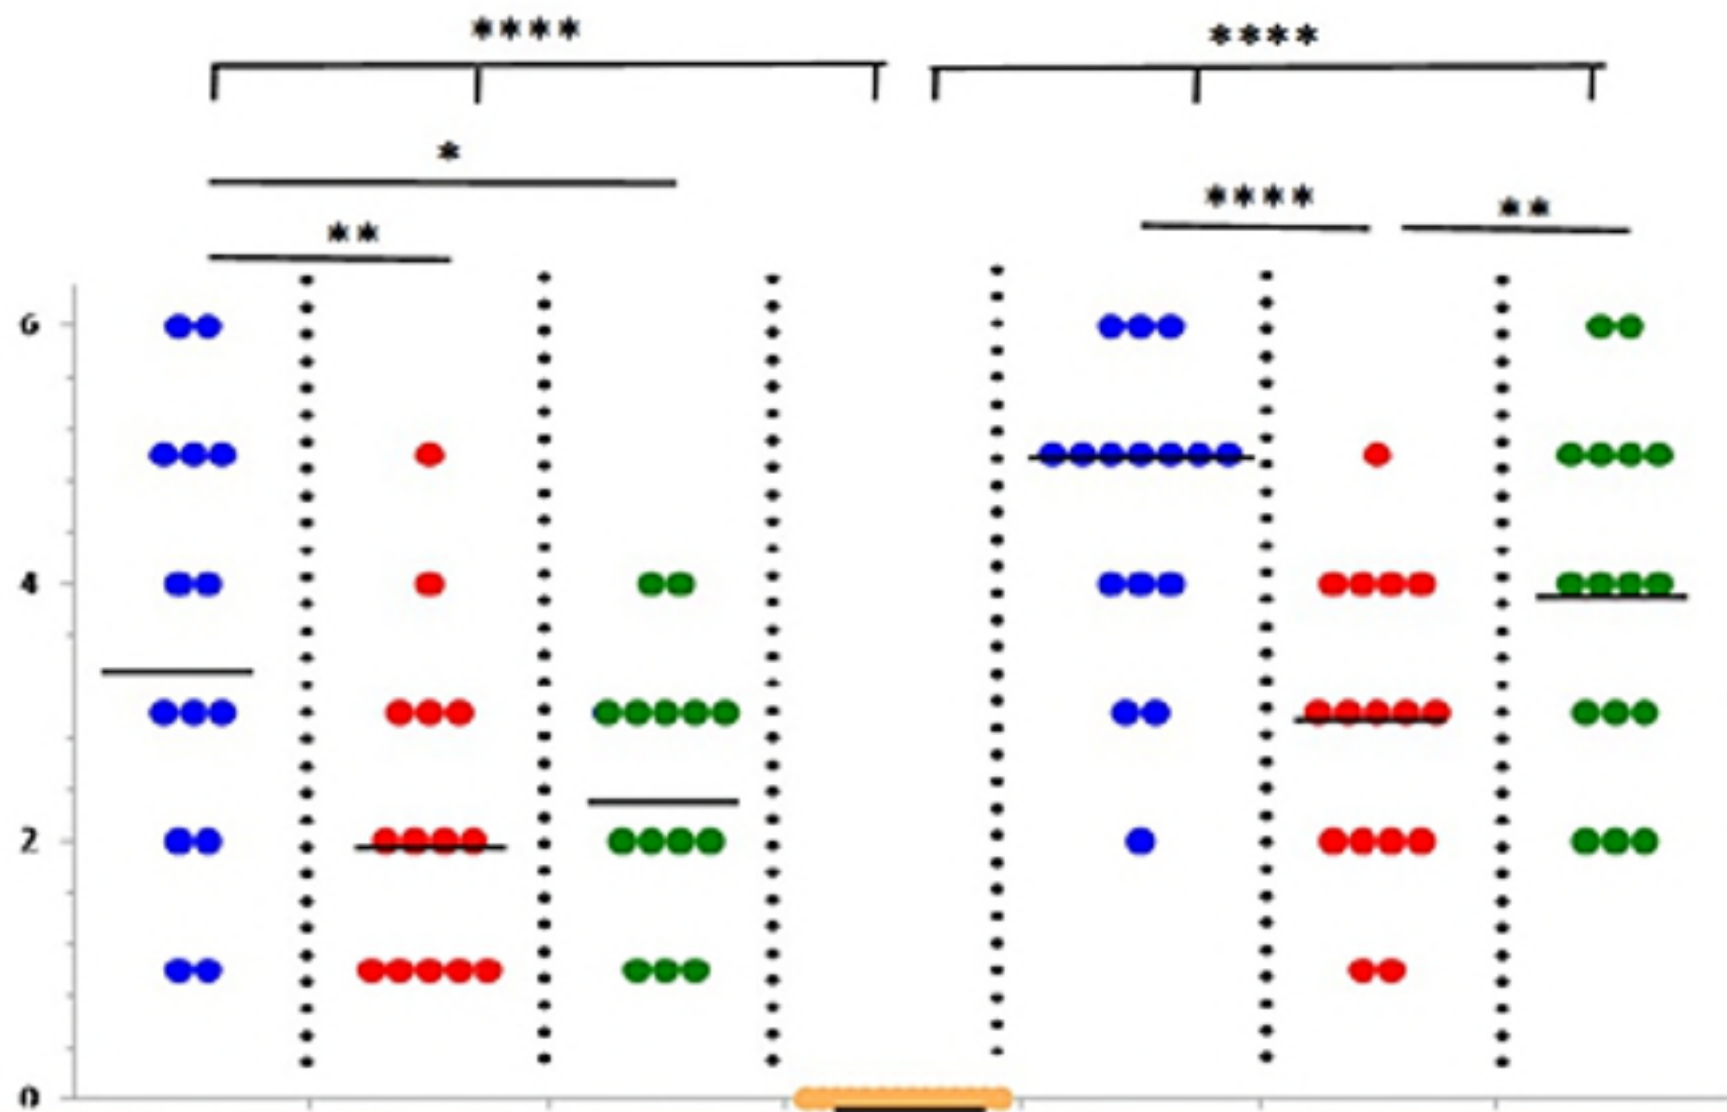

Iron (ppm)

100

200

400

200

100

200

400

DSS (2%)

+

+

+

-

+

+

+

Time (days)

10

10

10

10/8

8

8

8

## Faecal calprotectin concentrations 4 groups

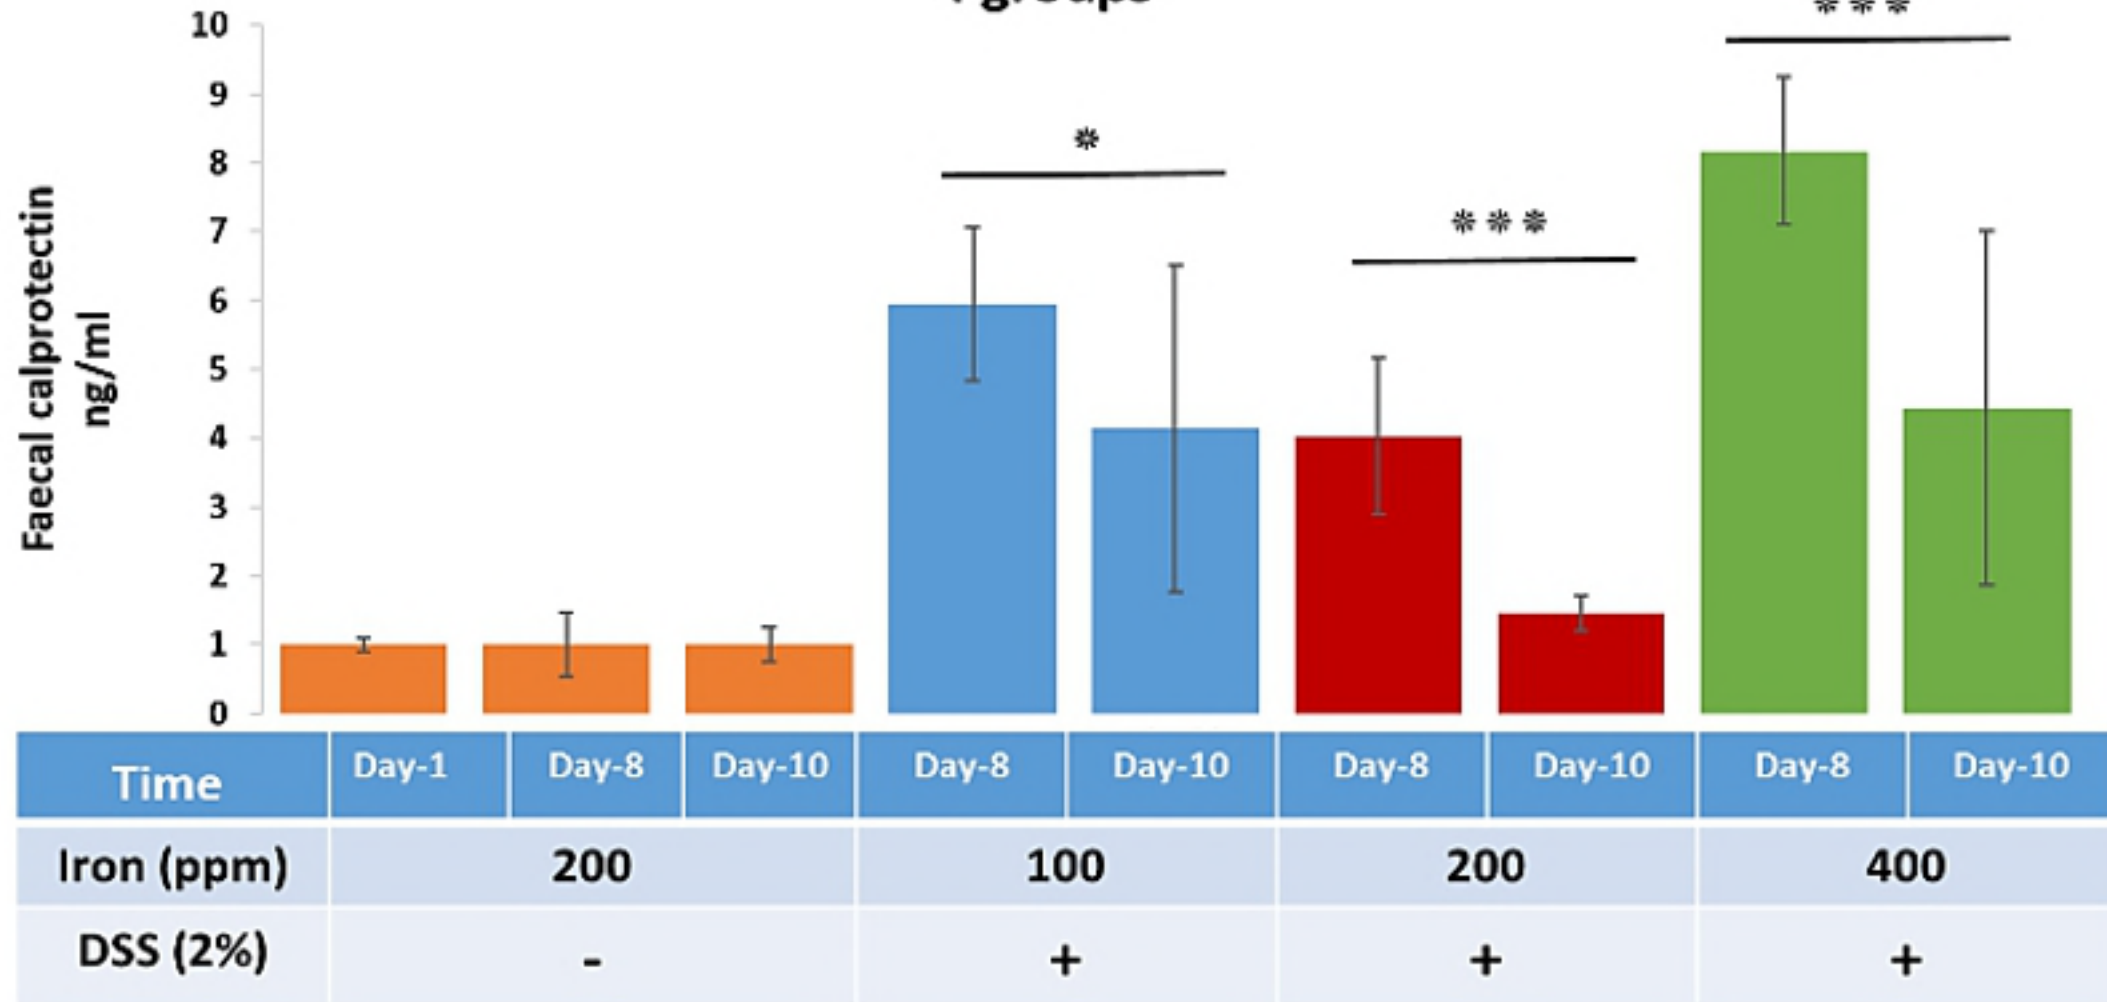

(a)

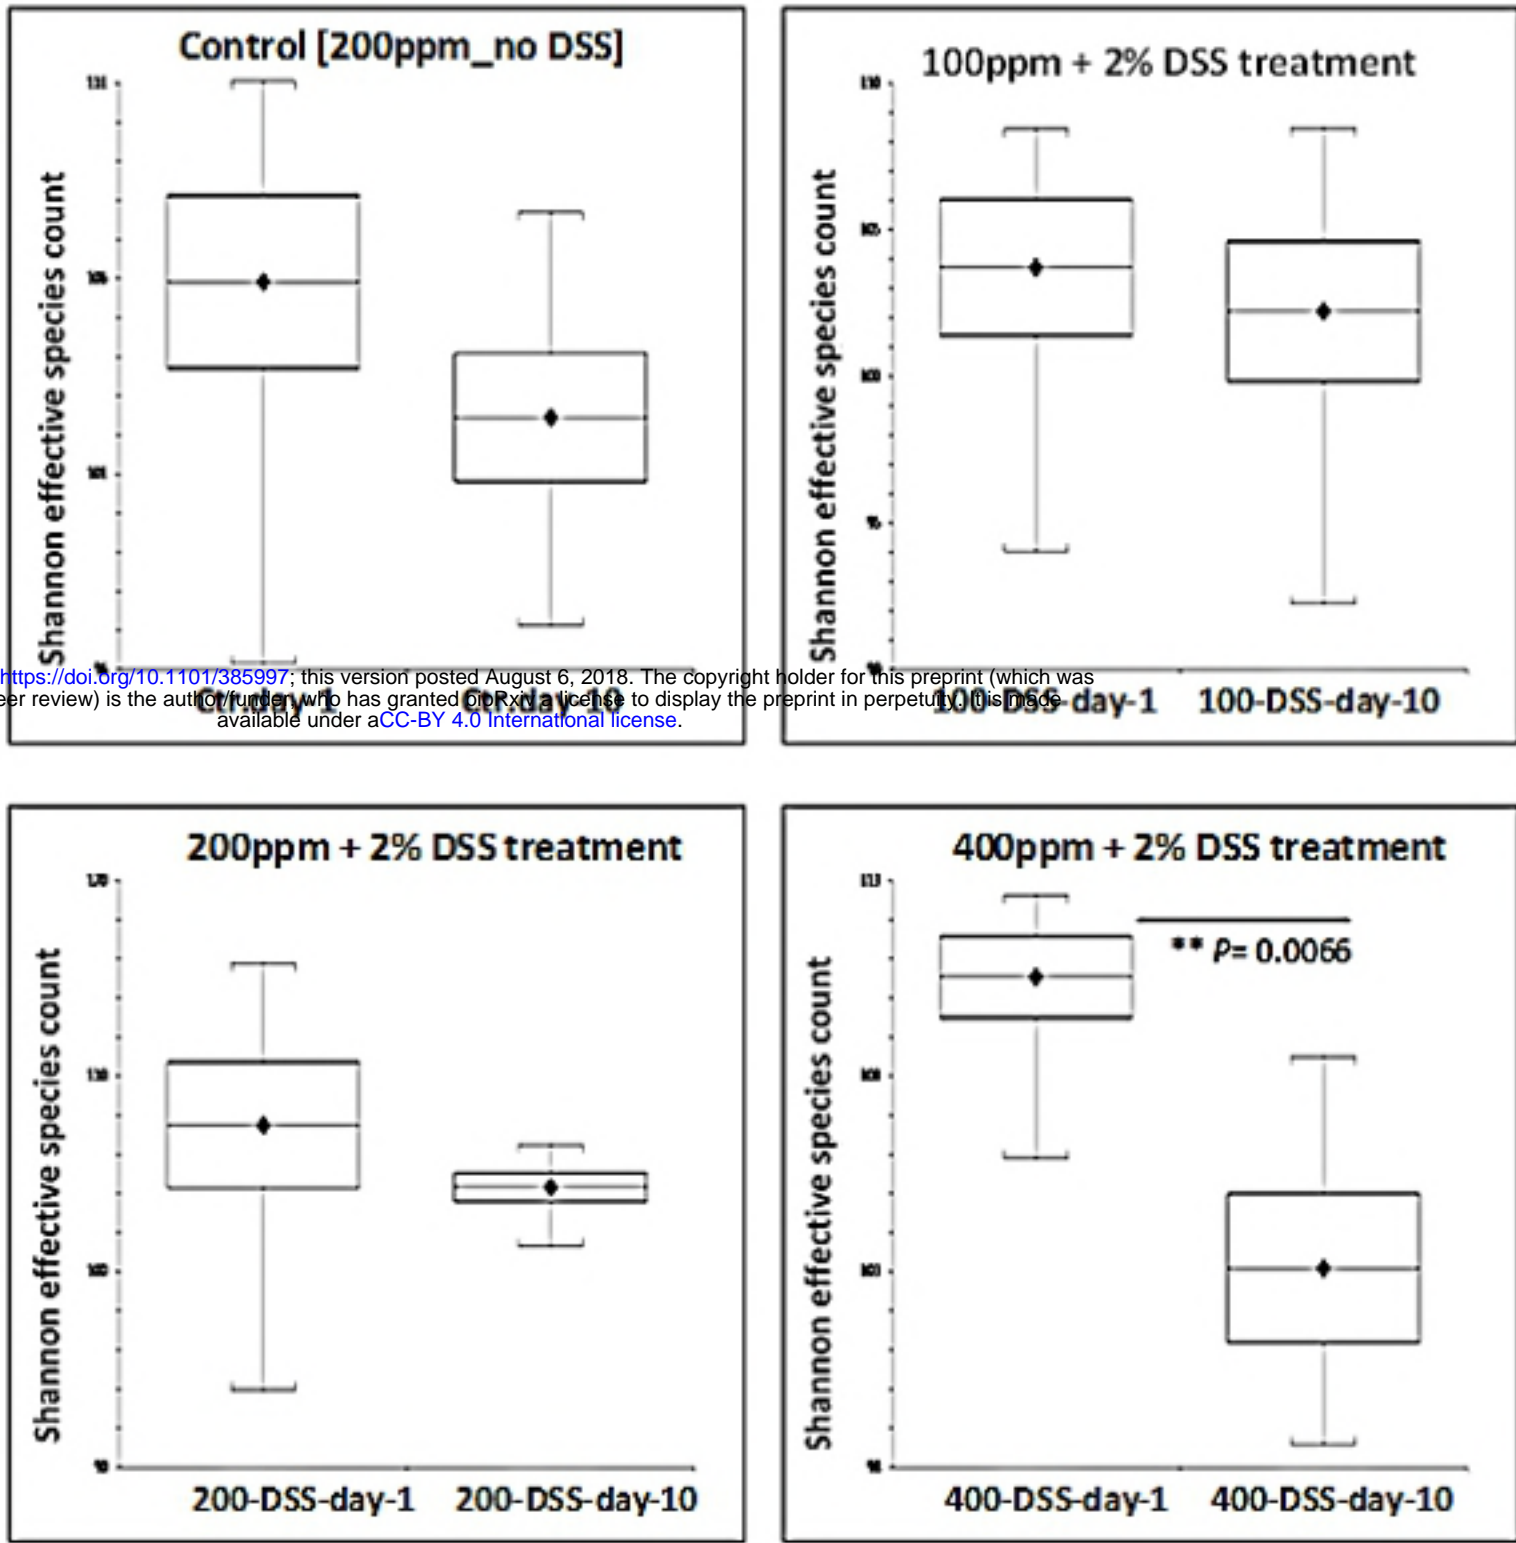

bioRxiv preprint doi: <https://doi.org/10.1101/385997>; this version posted August 6, 2018. The copyright holder for this preprint (which was not certified by peer review) is the author/funder, who has granted bioRxiv a license to display the preprint in perpetuity. It is made available under aCC-BY 4.0 International license.

(b)

### Phylum level taxonomic composition of all samples (relative abundance)

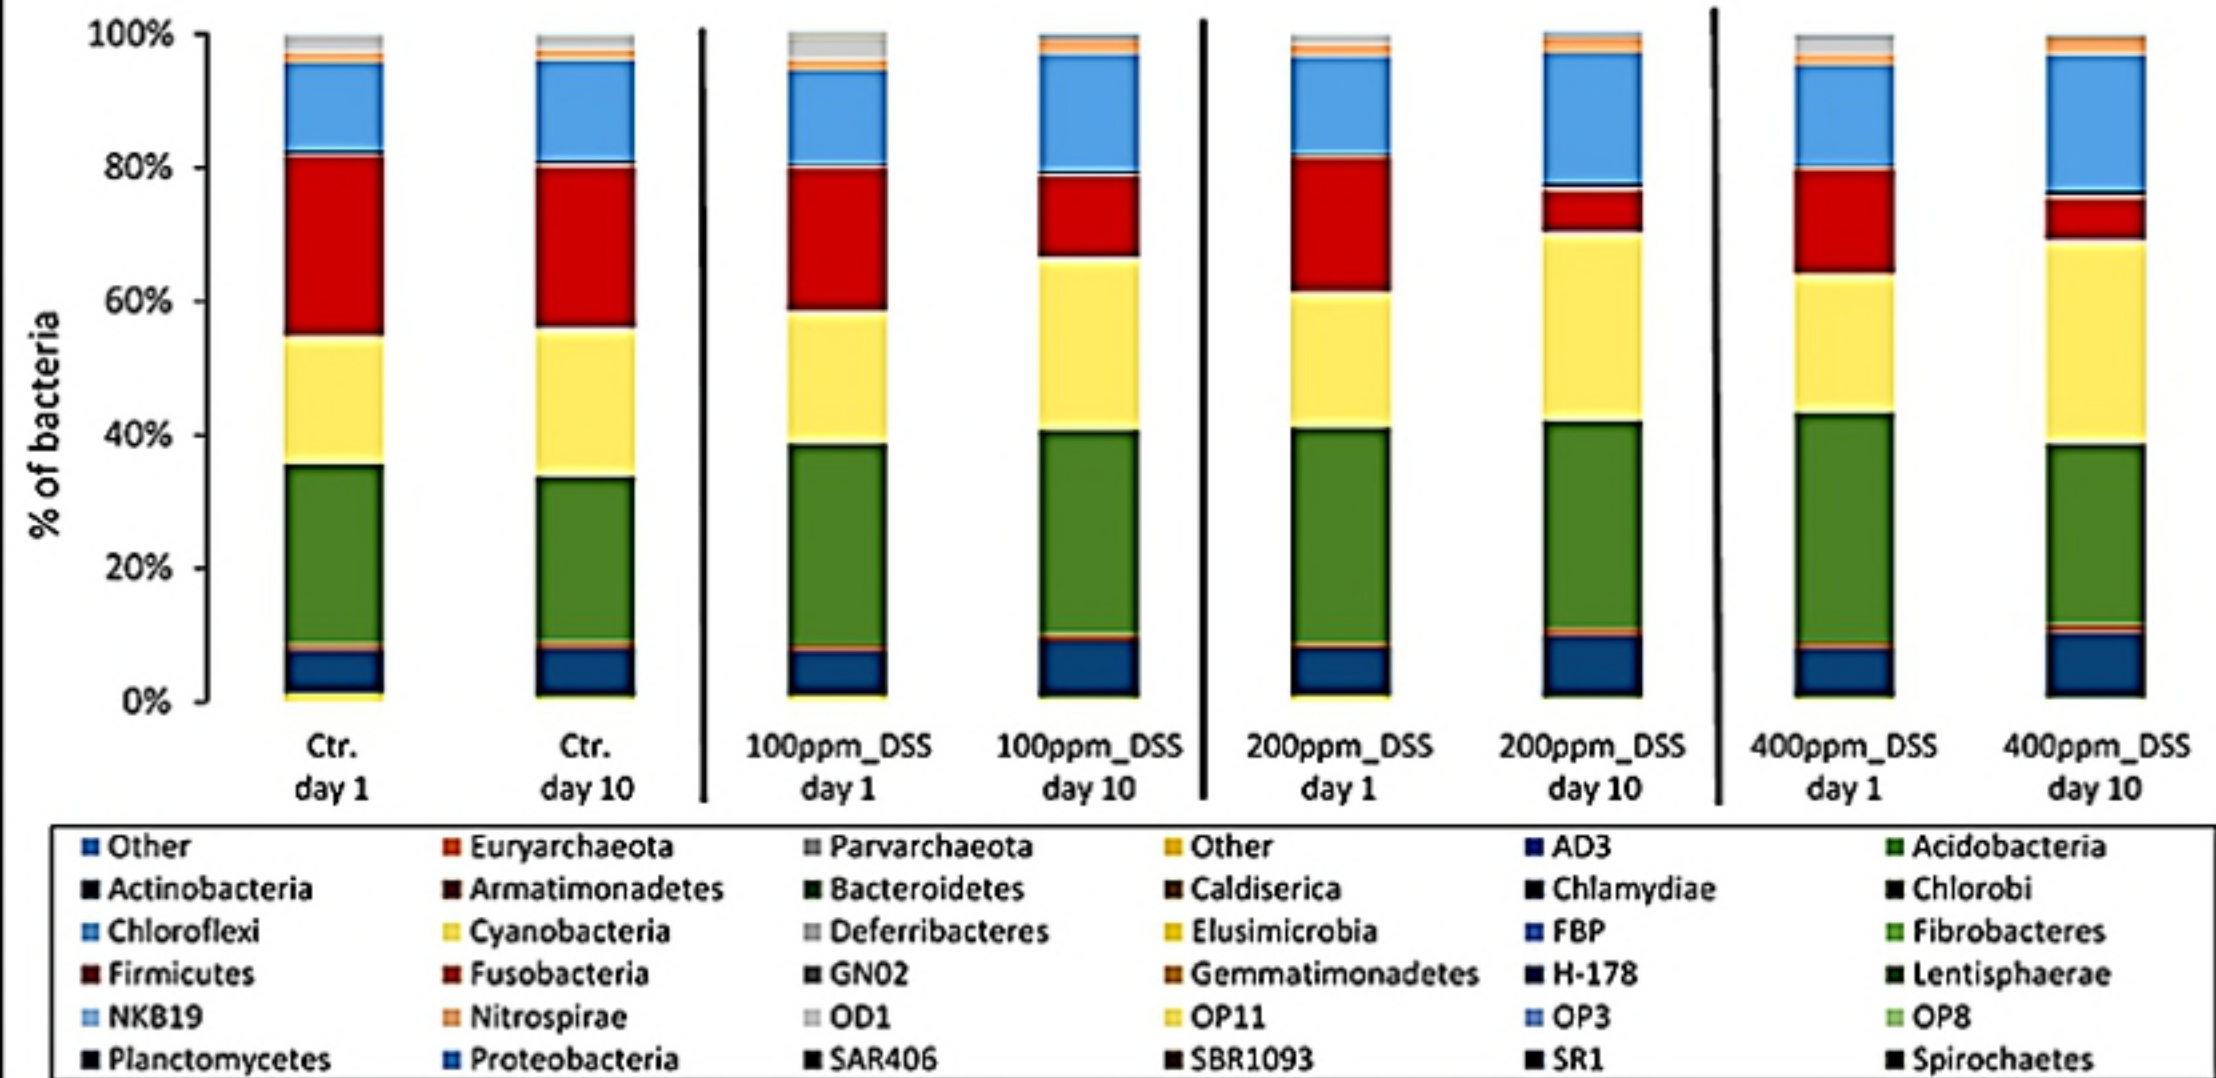



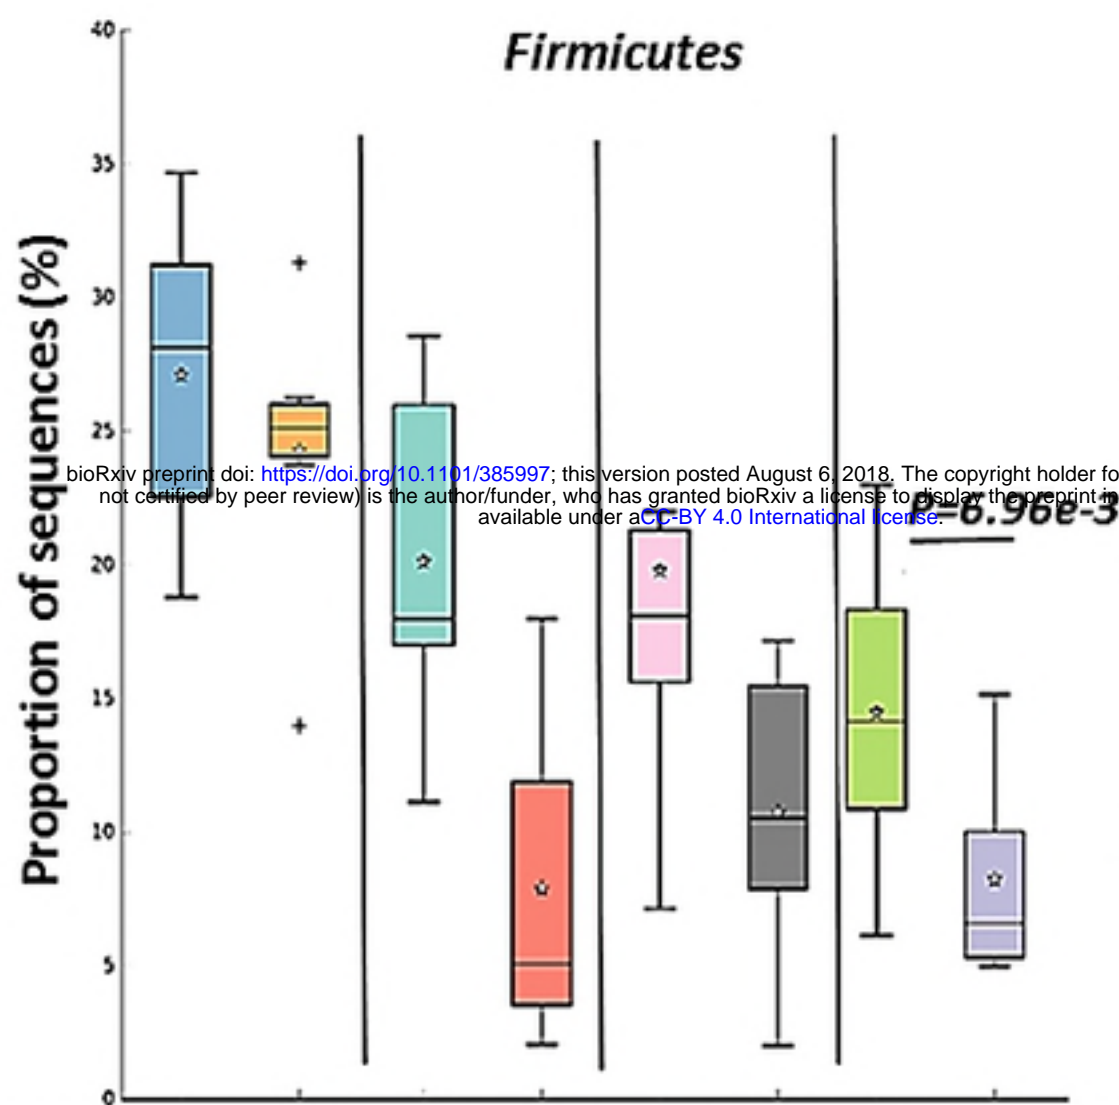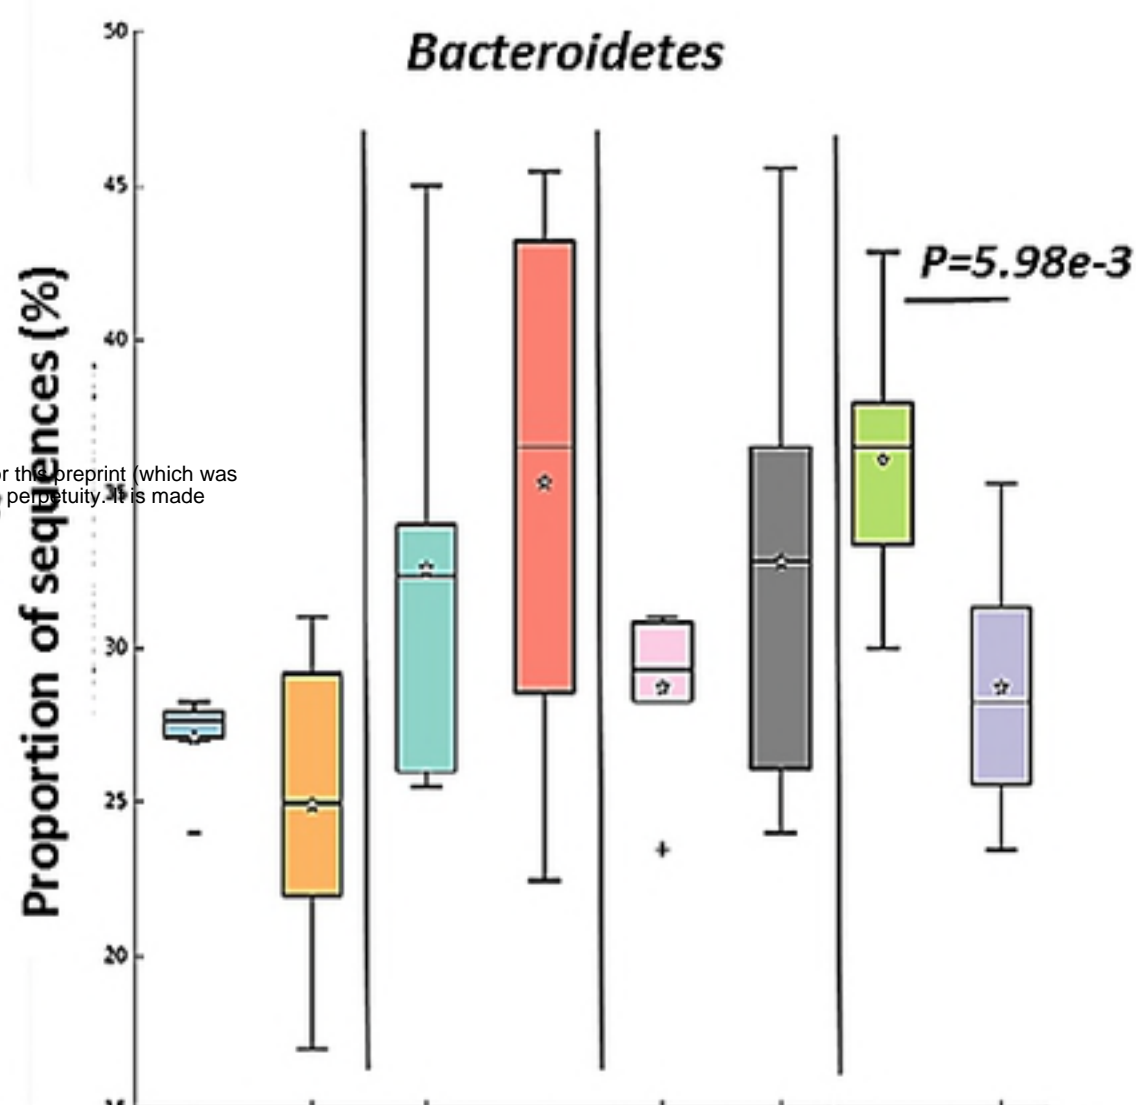

| Time <sub>day</sub> | 1   | 10  | 1   | 10  | 1   | 10  | 1   | 10  |
|---------------------|-----|-----|-----|-----|-----|-----|-----|-----|
| Iron <sub>ppm</sub> | 200 | 200 | 100 | 100 | 200 | 200 | 400 | 400 |
| DSS <sub>2%</sub>   | -   | -   | +   | +   | +   | +   | +   | +   |

| Time <sub>day</sub> | 1   | 10  | 1   | 10  | 1   | 10  | 1   | 10  |
|---------------------|-----|-----|-----|-----|-----|-----|-----|-----|
| Iron <sub>ppm</sub> | 200 | 200 | 100 | 100 | 200 | 200 | 400 | 400 |
| DSS <sub>2%</sub>   | -   | -   | +   | +   | +   | +   | +   | +   |

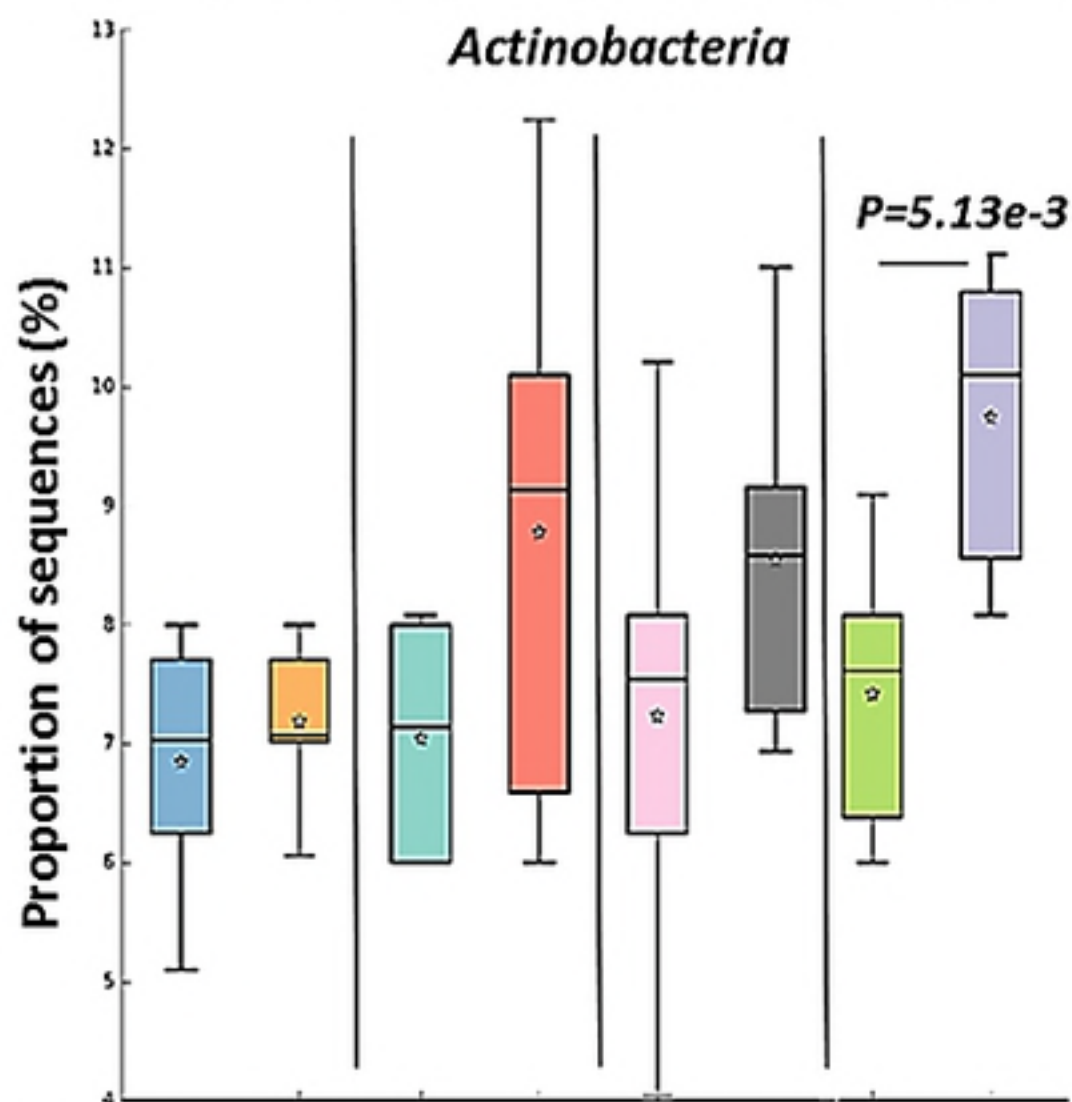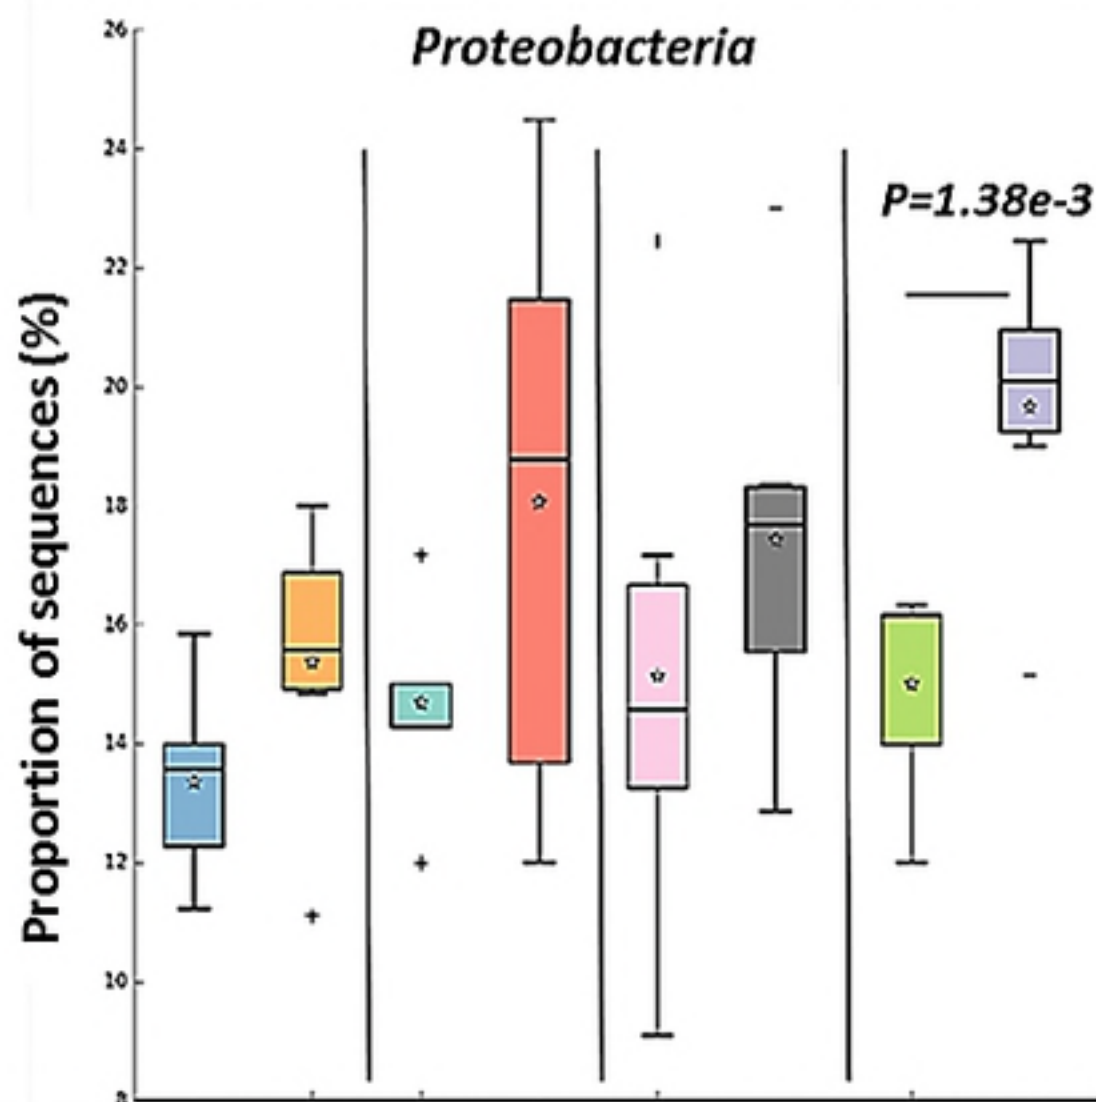

| Time <sub>day</sub> | 1   | 10  | 1   | 10  | 1   | 10  | 1   | 10  |
|---------------------|-----|-----|-----|-----|-----|-----|-----|-----|
| Iron <sub>ppm</sub> | 200 | 200 | 100 | 100 | 200 | 200 | 400 | 400 |
| DSS <sub>2%</sub>   | -   | -   | +   | +   | +   | +   | +   | +   |

| Time <sub>day</sub> | 1   | 10  | 1   | 10  | 1   | 10  | 1   | 10  |
|---------------------|-----|-----|-----|-----|-----|-----|-----|-----|
| Iron <sub>ppm</sub> | 200 | 200 | 100 | 100 | 200 | 200 | 400 | 400 |
| DSS <sub>2%</sub>   | -   | -   | +   | +   | +   | +   | +   | +   |



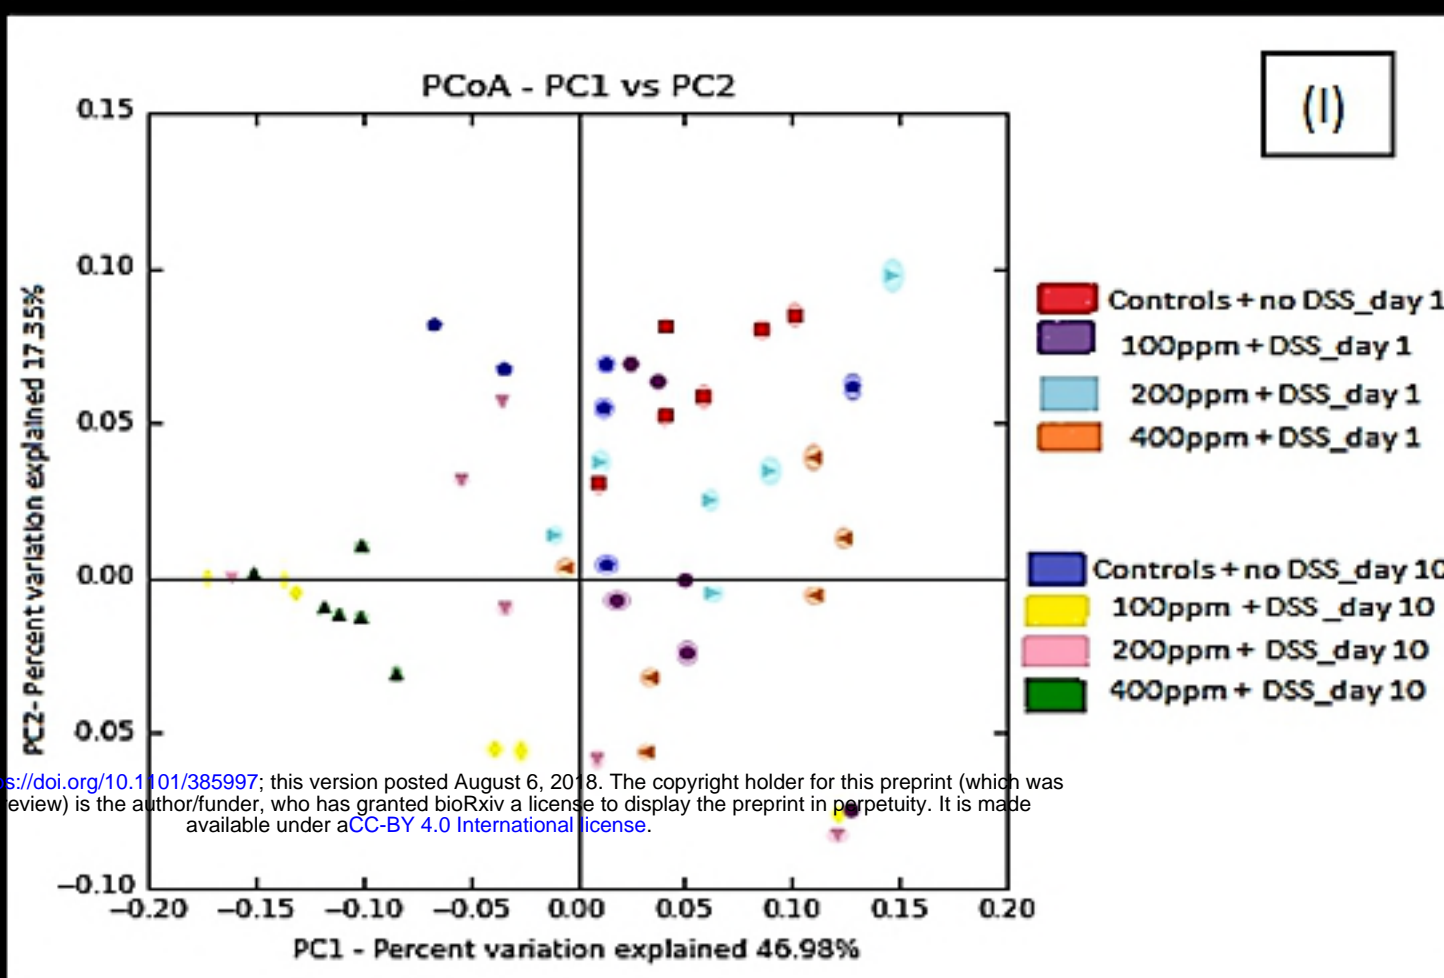

(II)

**200ppm iron, Untreated**

**100ppm iron, DSS-treated**

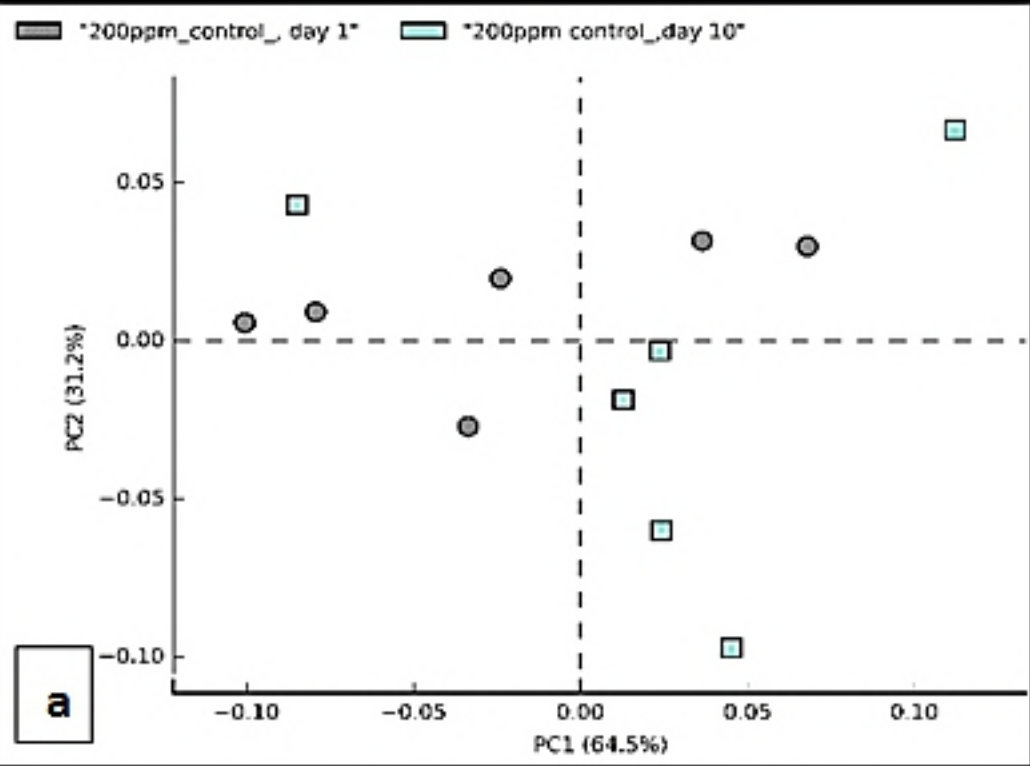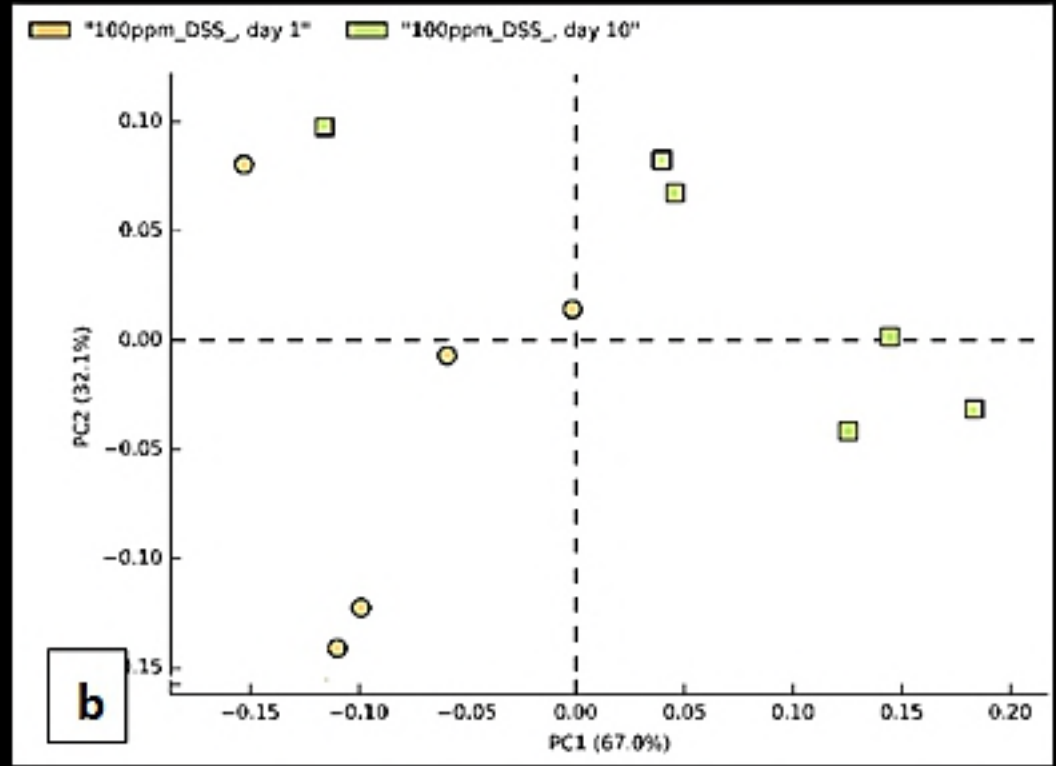

**200ppm iron, DSS-treated**

**400ppm iron, DSS-treated**

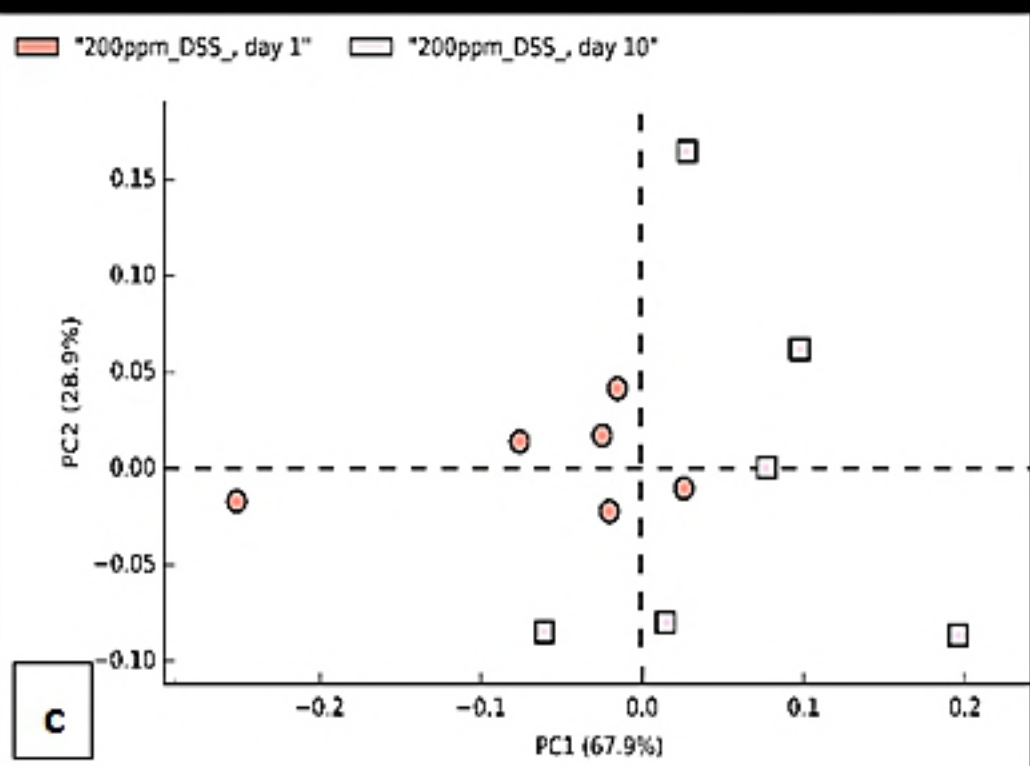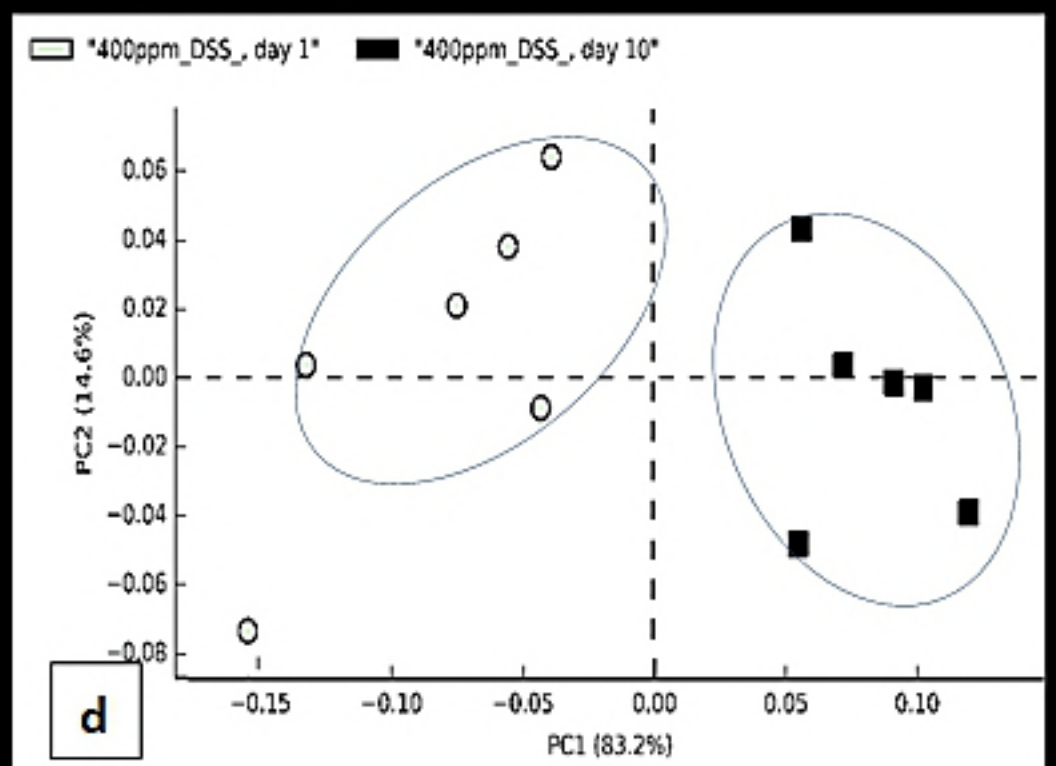

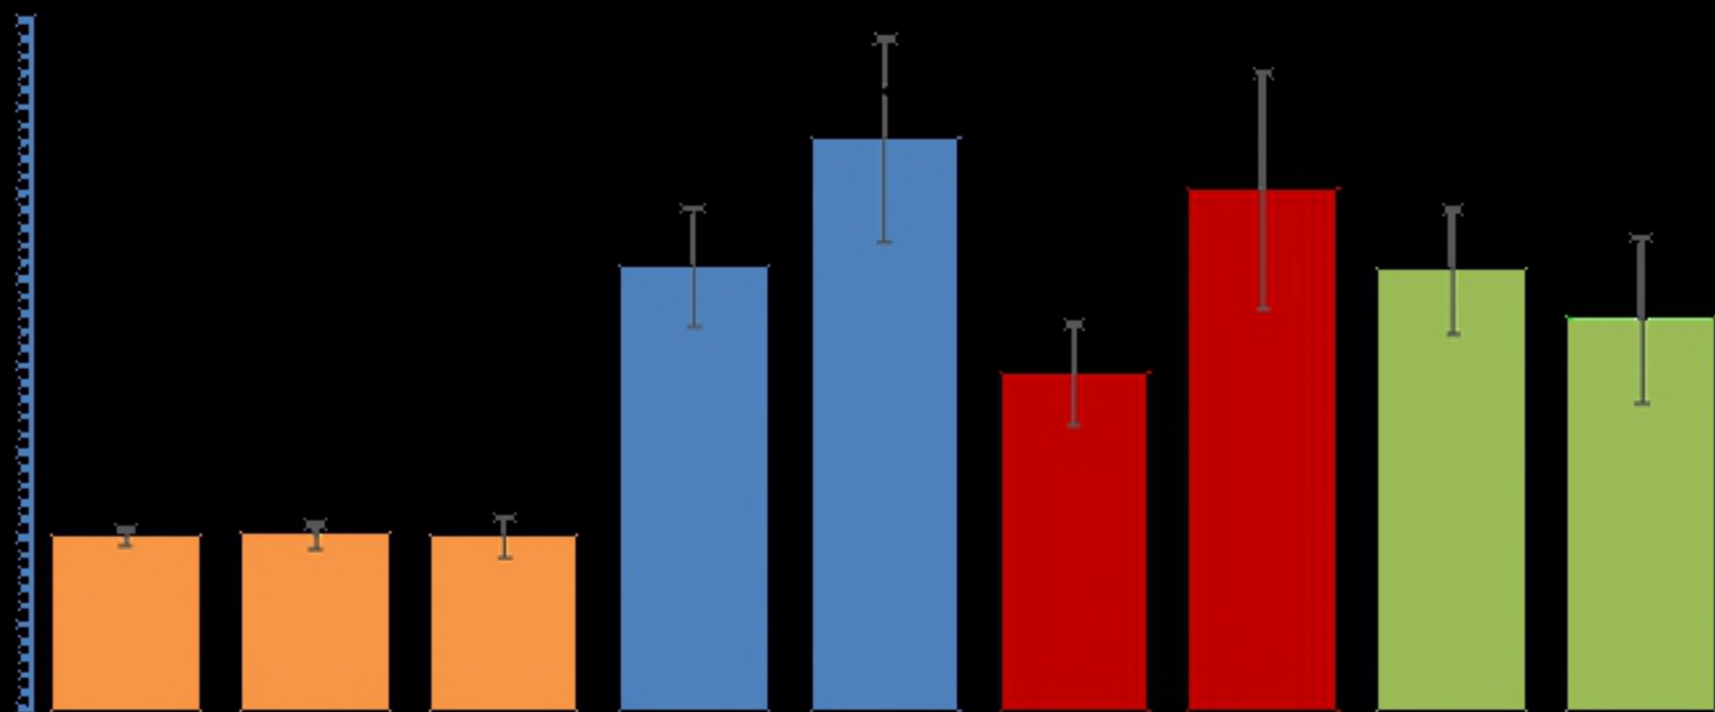

| Time       | Day-1 | Day-8 | Day-10 | Day-8 | Day-10 | Day-8 | Day-10 | Day-8 | Day-10 |
|------------|-------|-------|--------|-------|--------|-------|--------|-------|--------|
| Iron (ppm) | 200   |       |        | 100   |        | 200   |        | 400   |        |
| DSS (2%)   | -     |       |        | +     |        | +     |        | +     |        |
